# Supplementary material for: Highly effective copper-catalyzed decarboxylative coupling of aryl halides with alkynyl carboxylic acids
Source: Royal Society of Chemistry journal article supplement (doi:10.1039/c1ob05969f), 2011-01-01

## Supporting Information

### **Highly Effective Copper-Catalyzed Decarboxylative Coupling of Aryl Halides with Alkynyl Carboxylic Acids**

*Xiaoming Qu, Tingyi Li, Peng Sun, Yan Zhu, Hailong Yang and Jincheng Mao\**

*Key Laboratory of Organic Synthesis of Jiangsu Province,*

*College of Chemistry, Chemical Engineering and Materials Science*

*Soochow University, Suzhou 215123, P. R. China*

(Fax: +86-512-65880089, e-mail: [jcmiao@suda.edu.cn](mailto:jcmiao@suda.edu.cn))

## Experimental Section

### General

All reactions were carried out under an argon atmosphere condition. Solvents were dried and degassed by standard methods and all propiolic acids and aryl halides were purchased from Aldrich and Alfa. Flash column chromatography was performed using silica gel (300-400 mesh). Analytical thin-layer chromatography was performed using glass plates pre-coated with 200-400 mesh silica gel impregnated with a fluorescent indicator (254 nm). NMR spectra were measured in CDCl<sub>3</sub> on a Varian Inova-400 NMR spectrometer (400 MHz or 300 MHz) with TMS as an internal reference. Products were characterized by comparison of <sup>1</sup>H NMR, <sup>13</sup>C NMR and TOF-MS data in the literatures.

**General procedure for copper-catalyzed decarboxylative coupling of various aryl halides and alkynoic acids in the presence of A:** Aryl halide (0.5 mmol), alkynoic acid (0.6 mmol), CuI (2 mol%), **A** (4 mol%) and K<sub>2</sub>CO<sub>3</sub> (1.0 mmol) were added to a screw-capped test tube. The tube was then evacuated and backfilled with argon (3 cycles). DMSO (2 mL) was added by syringe at room temperature. The tube was again evacuated and backfilled with argon (3 cycles). The mixture was heated to 90 °C and stirred for 24 h. After cooling to room temperature, the mixture was diluted with water, and the combined aqueous phases were extracted three times with ethyl acetate. The organic layers were combined, dried over Na<sub>2</sub>SO<sub>4</sub>, and concentrated to yield the crude product, which was further purified by silica gel chromatography, using petroleum ether and ethyl acetate as eluent to provide the desired product.

## Copy of Certificate of Analysis of CuI from Aldrich:

# Certificate of Analysis

SIGMA-ALDRICH®

|                          |                                                 |
|--------------------------|-------------------------------------------------|
| <b>Product Name</b>      | Copper(I) iodide,<br>99.999% trace metals basis |
| <b>Product Number</b>    | 215554                                          |
| <b>Product Brand</b>     | ALDRICH                                         |
| <b>CAS Number</b>        | 7681-65-4                                       |
| <b>Molecular Formula</b> | CuI                                             |
| <b>Molecular Weight</b>  | 190.45                                          |

| TEST                             | SPECIFICATION                                                   | LOT MKBB2521 RESULTS |
|----------------------------------|-----------------------------------------------------------------|----------------------|
| Appearance (Color): Grey to Tan  | Conforms to Requirements                                        | Beige                |
| Appearance (Form): Powder/Chunks | Conforms to Requirements                                        | Powder               |
| Complexometric EDTA: % Cu        | 31.0 - 34.0 %                                                   | 33.7 %               |
| ICP: Confirms Copper Component   | Confirmed                                                       | Conforms             |
| Trace Metal Analysis             | ≤20.0 ppm                                                       | 3.7 ppm              |
| Cesium (Cs)                      | ppm                                                             | 0.4 ppm              |
| Calcium (Ca)                     | ppm                                                             | 2.1 ppm              |
| Silver (Ag)                      | ppm                                                             | 0.2 ppm              |
| Zinc (Zn)                        | ppm                                                             | 0.4 ppm              |
| Lead (Pb)                        | ppm                                                             | 0.3 ppm              |
| Cobalt (Co)                      | ppm                                                             | 0.2 ppm              |
| Europium (Eu)                    | ppm                                                             | 0.1 ppm              |
| Purity                           | Meets Requirements<br>99.999% Based On Trace Metals<br>Analysis | Meets Requirements   |
| Specification Date:              |                                                                 | MAR 2009             |
| Date of QC Release:              |                                                                 | SEP 2009             |
| Print Date:                      |                                                                 | SEP 02 2009          |



Barbara Rajzer, Supervisor  
Quality Control  
Milwaukee, Wisconsin USA

## Characterization of the corresponding products:

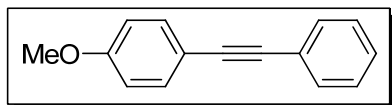

$^1\text{H}$  NMR (400 MHz,  $\text{CDCl}_3$ )  $\delta$ : 7.50–7.52 (m, 2H), 7.47 (d,  $J = 8.8$  Hz, 2H), 7.32–7.36 (m, 3H), 6.88 (d,  $J = 8.8$  Hz, 2H), 3.83 (s, 3H,  $\text{CH}_3$ );  $^{13}\text{C}$  NMR (100 MHz,  $\text{CDCl}_3$ )  $\delta$ : 161.2 (C), 134.7 (CH), 133.1 (CH), 130.0 (CH), 129.6 (C), 125.2 (CH), 117.0 (C), 115.6 (CH), 91.0 (C), 89.7 (C), 56.9 (CH); HRMS ( $\text{ESI}^+$ ): calcd. for  $[\text{C}_{15}\text{H}_{12}\text{O}]^+$  requires  $m/z$  208.0888, found 208.0896.

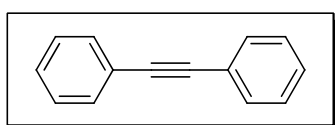

$^1\text{H}$  NMR (400 MHz,  $\text{CDCl}_3$ )  $\delta$ : 7.48–7.59 (m, 4H), 7.29–7.39 (m, 6H);  $^{13}\text{C}$  NMR (100 MHz,  $\text{CDCl}_3$ )  $\delta$ : 133.3 (CH), 130.0 (CH), 129.9 (CH), 124.9 (C), 91.0 (C); HRMS ( $\text{ESI}^+$ ): calcd. for  $[\text{C}_{14}\text{H}_{10}]^+$  requires  $m/z$  178.0783, found 178.0791.

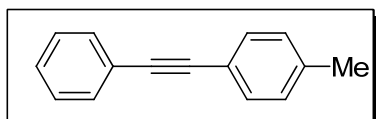

$^1\text{H}$  NMR (400 MHz,  $\text{CDCl}_3$ )  $\delta$ : 7.52–7.54 (m, 2H), 7.43 (d,  $J = 8.0$  Hz, 2H), 7.33–7.37 (m, 3H), 7.16 (d,  $J = 8.0$  Hz, 2H), 2.37 (s, 3H);  $^{13}\text{C}$  NMR (100 MHz,  $\text{CDCl}_3$ )  $\delta$ : 140.0 (C), 133.2 (CH), 133.1 (CH), 130.8 (CH), 130.0 (CH), 129.7 (CH), 125.1 (C), 121.8 (C), 91.2 (C), 90.4 (C), 23.2 (CH); HRMS ( $\text{ESI}^+$ ): calcd. for  $[\text{C}_{15}\text{H}_{12}]^+$  requires  $m/z$  192.0939, found 192.0926.

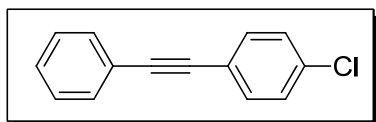

$^1\text{H}$  NMR (400 MHz,  $\text{CDCl}_3$ )  $\delta$ : 7.53 (t,  $J = 7.6$  Hz, 2H), 7.46 (d,  $J = 8.4$  Hz, 2H), 7.34–7.36 (m, 4H), 7.32 (s, 1H);  $^{13}\text{C}$  NMR (100 MHz,  $\text{CDCl}_3$ )  $\delta$ : 135.9 (C), 134.5 (CH), 133.3 (CH), 130.3 (CH), 130.1 (CH), 130.0 (CH), 124.6 (C), 123.4 (C), 91.9 (C), 89.9 (C); HRMS ( $\text{ESI}^+$ ): calcd. for  $[\text{C}_{14}\text{H}_9\text{Cl}]^+$  requires  $m/z$  212.0393, found 212.0396.

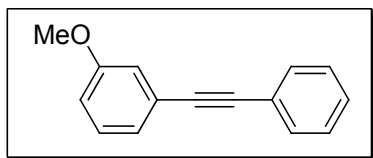

$^1\text{H}$  NMR (400 MHz,  $\text{CDCl}_3$ )  $\delta$ : 7.52–7.55 (m, 2H), 7.34–7.37 (m, 3H), 7.23–7.27 (m, 1H), 7.13 (d,  $J = 7.6$  Hz, 2H), 7.06 (s, 1H), 6.88–6.91 (m, 1H), 2.82 (s, 3H);  $^{13}\text{C}$  NMR (100 MHz,  $\text{CDCl}_3$ )  $\delta$ : 161.0 (C), 133.3 (CH), 131.1 (CH), 130.0 (CH), 130.0 (CH), 125.9 (CH), 125.8 (C), 124.8 (CH), 117.9 (C), 116.6 (CH), 90.9 (C), 90.8 (C), 56.9 (CH); HRMS (ESI<sup>+</sup>): calcd. for  $[\text{C}_{15}\text{H}_{12}\text{O}]^+$  requires  $m/z$  208.0888, found 208.0884.

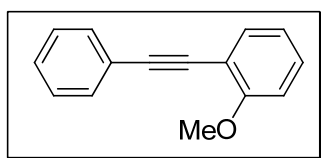

$^1\text{H}$  NMR (400 MHz,  $\text{CDCl}_3$ )  $\delta$ : 7.64–7.67 (m, 2H), 7.59 (d,  $J = 7.6$  Hz, 1H), 7.39–7.42 (m, 4H), 6.97–7.04 (m, 2H), 3.99 (s, 3H);  $^{13}\text{C}$  NMR (100 MHz,  $\text{CDCl}_3$ )  $\delta$ : 161.5 (C), 135.2 (CH), 133.3 (CH), 131.4 (CH), 129.9 (CH), 129.8 (CH), 125.2 (CH), 122.1 (C), 114.0 (C), 112.3 (CH), 95.1 (C), 87.4 (C), 57.5 (CH); HRMS (ESI<sup>+</sup>): calcd. for  $[\text{C}_{15}\text{H}_{12}\text{O}]^+$  requires  $m/z$  208.0888, found 208.1000.

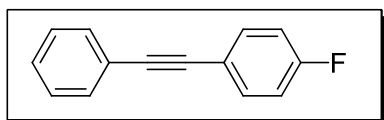

$^1\text{H}$  NMR (400 MHz,  $\text{CDCl}_3$ )  $\delta$ : 7.50–7.53 (m, 4H), 7.34–7.36 (m, 3H), 7.05 (t,  $J = 8.4$  Hz, 2H);  $^{13}\text{C}$  NMR (100 MHz,  $\text{CDCl}_3$ )  $\delta$ : 165.4 (d,  $J = 249.5$  Hz, C), 135.2 (d,  $J = 8.3$  Hz, CH), 133.2 (CH), 130.0 (d,  $J = 3.7$  Hz, CH), 124.7 (C), 121.0 (d,  $J = 3.4$  Hz, CH), 117.4 (C), 117.2 (C), 90.7 (C), 89.2 (C); HRMS (ESI<sup>+</sup>): calcd. for  $[\text{C}_{14}\text{H}_9\text{F}]^+$  requires  $m/z$  196.0688, found 196.0690.

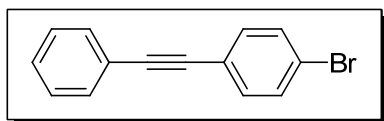

$^1\text{H}$  NMR (400 MHz,  $\text{CDCl}_3$ )  $\delta$ : 7.47–7.52 (m, 4H), 7.35–7.40 (m, 5H);  $^{13}\text{C}$  NMR (100 MHz,  $\text{CDCl}_3$ )  $\delta$ : 137.7 (C), 134.6 (CH), 133.2 (CH), 130.1 (CH), 130.0 (CH), 124.5 (CH), 124.1 (C),

123.8 (C), 92.1 (C), 89.9 (C); HRMS (ESI<sup>+</sup>): calcd. for [C<sub>14</sub>H<sub>9</sub>Br]<sup>+</sup> requires m/z 255.9888, found 255.9886.

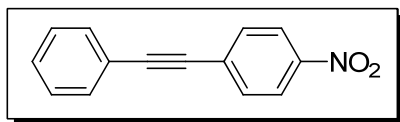

<sup>1</sup>H NMR (400 MHz, CDCl<sub>3</sub>) δ: 8.24 (d, *J* = 8.4 Hz, 2H), 7.69 (d, *J* = 8.4 Hz, 2H), 7.57–7.60 (m, 2H), 7.41–7.42 (m, 3H); <sup>13</sup>C NMR (100 MHz, CDCl<sub>3</sub>) δ: 148.6(C), 133.9(CH), 133.5(CH), 131.9(CH), 130.9 (CH), 130.2(CH), 125.3 (C), 123.7(C), 96.3(C), 89.2(C); HRMS (ESI<sup>+</sup>): calcd. for [C<sub>14</sub>H<sub>9</sub>NO<sub>2</sub>]<sup>+</sup> requires m/z 223.0633, found 223.0635.

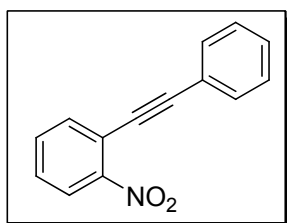

<sup>1</sup>H NMR (400 MHz, CDCl<sub>3</sub>) δ: 8.08 (d, *J* = 8.0 Hz, 1H), 7.72 (d, *J* = 7.6 Hz, 1H), 7.59–7.61 (m, 3H), 7.46 (t, *J* = 8.0 Hz, 1H), 7.38–7.39 (m, 3H); <sup>13</sup>C NMR (100 MHz, CDCl<sub>3</sub>) δ: 137.68(C), 136.22(C), 134.54(C), 133.65(CH), 130.89(CH), 130.21(CH), 130.10(CH), 126.39 (CH), 123.96(CH), 120.34(CH), 123.7(CH), 98.73(C), 86.43(C); HRMS (ESI<sup>+</sup>): calcd. for [C<sub>14</sub>H<sub>9</sub>NO<sub>2</sub>]<sup>+</sup> requires m/z 223.0633, found 223.0637.

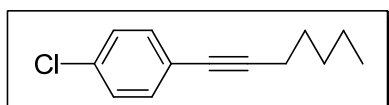

<sup>1</sup>H NMR (400 MHz, CDCl<sub>3</sub>) δ: 7.31 (d, *J* = 8.0 Hz, 2H), 7.24 (d, *J* = 8.0 Hz, 2H), 2.38 (t, *J* = 7.2 Hz, 2H), 1.56–1.63 (m, 2H), 1.34–1.44 (m, 4H), 0.92 (t, *J* = 7.2 Hz, 2H); <sup>13</sup>C NMR (100 MHz, CDCl<sub>3</sub>) δ: 134.4 (CH), 131.5 (CH), 130.1 (CH), 121.7 (CH), 93.2 (C), 81.1 (C), 32.8 (CH<sub>2</sub>), 30.0 (CH<sub>2</sub>), 23.9 (CH<sub>2</sub>), 21.0 (CH<sub>2</sub>), 15.6 (CH<sub>3</sub>); HRMS (ESI<sup>+</sup>): calcd. for [C<sub>13</sub>H<sub>15</sub>Cl]<sup>+</sup> requires m/z 206.0862, found 206.0864.

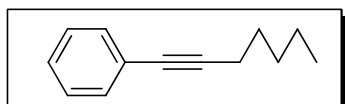

$^1\text{H}$  NMR (400 MHz,  $\text{CDCl}_3$ )  $\delta$ : 7.41–7.43 (m, 2H), 7.29–7.30 (m, 3H), 2.43 (t,  $J = 7.2$  Hz, 2H), 1.60–1.67 (m, 2H), 1.37–1.48 (m, 4H), 0.95 (t,  $J = 7.2$  Hz, 3H);  $^{13}\text{C}$  NMR (100 MHz,  $\text{CDCl}_3$ )  $\delta$ : 133.17 (CH), 129.83 (CH), 129.11 (CH), 125.68 (CH), 92.13 (C), 82.15 (C), 32.79 ( $\text{CH}_2$ ), 30.13 ( $\text{CH}_2$ ), 23.94 ( $\text{CH}_2$ ), 21.04 ( $\text{CH}_2$ ), 15.72 ( $\text{CH}_3$ ); HRMS ( $\text{ESI}^+$ ): calcd. for  $[\text{C}_{13}\text{H}_{16}]^+$  requires  $m/z$  172.1252, found 172.1250.

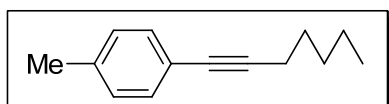

$^1\text{H}$  NMR (400 MHz,  $\text{CDCl}_3$ )  $\delta$ : 7.28 (d,  $J = 8.0$  Hz, 2H), 7.07 (d,  $J = 8.0$  Hz, 2H), 2.38 (t,  $J = 7.2$  Hz, 2H), 2.32 (s, 3H), 1.56–1.63 (m, 2H), 1.32–1.46 (m, 4H), 0.92 (t,  $J = 7.2$  Hz, 3H);  $^{13}\text{C}$  NMR (100 MHz,  $\text{CDCl}_3$ )  $\delta$ : 137.63 (C), 131.64 (C), 129.17 (CH), 121.23 (CH), 89.89 (C), 80.78 (C), 31.40 ( $\text{CH}_2$ ), 28.80 ( $\text{CH}_2$ ), 22.52 ( $\text{CH}_2$ ), 21.65 ( $\text{CH}_2$ ), 19.66 ( $\text{CH}_3$ ), 14.29 ( $\text{CH}_3$ ); HRMS ( $\text{ESI}^+$ ): calcd. for  $[\text{C}_{14}\text{H}_{18}]^+$  requires  $m/z$  186.1409, found 186.1409.

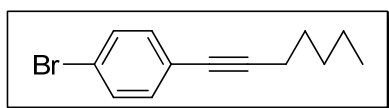

$^1\text{H}$  NMR (400 MHz,  $\text{CDCl}_3$ )  $\delta$ : 7.41 (d,  $J = 8.0$  Hz, 2H), 7.26 (d,  $J = 7.6$  Hz, 2H), 2.39 (t,  $J = 7.2$  Hz, 2H), 1.58–1.65 (m, 2H), 1.33–1.47 (m, 4H), 0.94 (t,  $J = 7.2$  Hz, 3H);  $^{13}\text{C}$  NMR (100 MHz,  $\text{CDCl}_3$ )  $\delta$ : 133.25 (C), 131.62 (CH), 123.30 (CH), 121.75 (C), 92.03 (C), 79.79 (C), 31.37 ( $\text{CH}_2$ ), 28.58 ( $\text{CH}_2$ ), 22.49 ( $\text{CH}_2$ ), 19.66 ( $\text{CH}_2$ ), 14.27 ( $\text{CH}_3$ ); HRMS ( $\text{ESI}^+$ ): calcd. for  $[\text{C}_{13}\text{H}_{15}\text{Br}]^+$  requires  $m/z$  250.0357, found 250.0357.

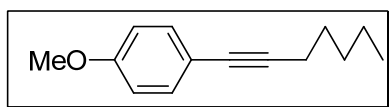

$^1\text{H}$  NMR (400 MHz,  $\text{CDCl}_3$ )  $\delta$ : 7.33–7.35 (m, 2H), 6.81–6.83 (m, 2H), 3.80 (s, 3H), 2.39 (t,  $J = 7.2$  Hz, 2H), 1.57–1.64 (m, 2H), 1.43–1.46 (m, 2H), 1.34–1.40 (m, 2H), 0.93 (t,  $J = 7.2$  Hz, 3H);  $^{13}\text{C}$  NMR (100 MHz,  $\text{CDCl}_3$ )  $\delta$ : 137.7 (CH), 134.4 (CH), 117.9 (CH), 115.4 (CH), 90.4 (C), 81.8 (C), 56.8 ( $\text{CH}_3$ ), 32.8 ( $\text{CH}_2$ ), 30.2 ( $\text{CH}_2$ ), 23.9 ( $\text{CH}_2$ ), 21.0 ( $\text{CH}_2$ ), 15.7 ( $\text{CH}_3$ ); HRMS ( $\text{ESI}^+$ ): calcd. for  $[\text{C}_{14}\text{H}_{18}\text{O}]^+$  requires  $m/z$  202.1358, found 202.1360.

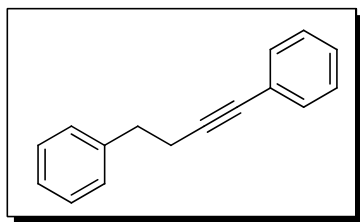

$^1\text{H}$  NMR (400 MHz,  $\text{CDCl}_3$ )  $\delta$ : 7.58 (d,  $J = 7.2$  Hz, 2H), 7.44 (t,  $J = 7.6$  Hz, 1H), 7.36 (t,  $J = 7.2$  Hz, 2H), 7.31 (d,  $J = 7.2$  Hz, 2H), 7.25–7.26 (m, 3H);  $^{13}\text{C}$  NMR (100 MHz,  $\text{CDCl}_3$ )  $\delta$ : 155.63 (C), 138.82 (C), 134.64 (CH), 132.31 (CH), 130.56 (CH), 130.21 (CH), 128.39 (CH), 121.18 (CH), 88.05 (C), 82.21 (C), 68.06 ( $\text{CH}_2$ ), 36.54 ( $\text{CH}_2$ ); HRMS ( $\text{ESI}^+$ ): calcd. for  $[\text{C}_{16}\text{H}_{14}]^+$  requires  $m/z$  206.1096, found 206.1095.

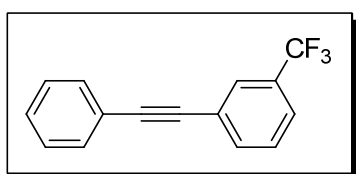

$^1\text{H}$  NMR (400 MHz,  $\text{CDCl}_3$ )  $\delta$ : 7.80 (s, 1H), 7.70 (d,  $J = 7.6$  Hz, 2H), 7.54–7.59 (m, 3H), 7.48 (t,  $J = 8.0$  Hz, 1H), 7.35 (t,  $J = 7.2$  Hz, 3H);  $^{13}\text{C}$  NMR (100 MHz,  $\text{CDCl}_3$ ) ( $\delta$ , ppm) 136.2 (C), 134.1 (CH), 133.3 (CH), 130.4 (q,  $J = 186$  Hz), 130.1 (C), 130.0 (C), 129.9 (CH), 126.7 (CH), 126.4 (q,  $J = 44$  Hz), 125.9 (CH), 124.2 (CH), 92.5 (C), 89.4 (C); HRMS ( $\text{ESI}^+$ ): calcd. for  $[\text{C}_{15}\text{H}_9\text{F}]^+$  requires  $m/z$  246.0656, found 246.0653.

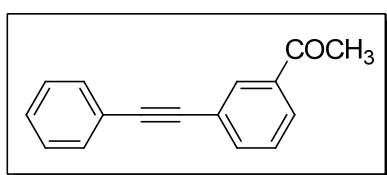

$^1\text{H}$  NMR (400 MHz,  $\text{CDCl}_3$ )  $\delta$ : 8.17 (s, 1H), 7.97 (d,  $J = 8.0$  Hz, 1H), 7.77 (d,  $J = 8.0$  Hz, 1H), 7.61–7.63 (m, 2H), 7.51–7.53 (m, 1H), 7.41–7.43 (m, 3H), 2.68 (s, 3H);  $^{13}\text{C}$  NMR (100 MHz,  $\text{CDCl}_3$ )  $\delta$ : 199.0 (C), 138.8 (C), 137.4 (CH), 133.3 (CH), 133.2 (CH), 130.4 (CH), 130.3 (CH), 130.1 (CH), 129.5 (C), 125.5 (C), 124.4 (CH), 92.0 (C), 90.0 (C), 28.3 (CH); HRMS ( $\text{ESI}^+$ ): calcd. for  $[\text{C}_{16}\text{H}_{12}\text{O}]^+$  requires  $m/z$  220.0888, found 220.0887.

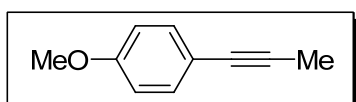



$^1\text{H}$  NMR (400 MHz,  $\text{CDCl}_3$ )  $\delta$ : 7.39 (d,  $J = 7.6$  Hz, 2H), 6.88 (d,  $J = 7.6$  Hz, 2H), 3.86 (s, 3H), 2.10 (s, 3H);  $^{13}\text{C}$  NMR (100 MHz,  $\text{CDCl}_3$ )  $\delta$ : 159.2 (C), 133.0 (C), 116.4 (CH), 114.0 (CH), 84.4 (C), 79.7 (C), 55.5 ( $\text{CH}_3$ ), 31.2 ( $\text{CH}_3$ ); HRMS ( $\text{ESI}^+$ ): calcd. for  $[\text{C}_{10}\text{H}_{10}\text{O}]^+$  requires  $m/z$  146.0732, found 146.0734.

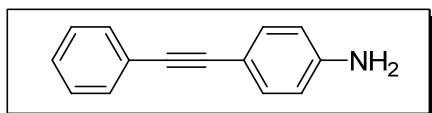

$^1\text{H}$  NMR (400 MHz,  $\text{CDCl}_3$ )  $\delta$ : 7.54 (d,  $J = 6.4$  Hz, 2H, ArH), 7.38–7.32 (m, 5H, ArH), 7.64 (d,  $J = 6.4$  Hz, 2H, ArH), 3.77 (s, 2H,  $\text{NH}_2$ );  $^{13}\text{C}$  NMR (100 MHz,  $\text{CDCl}_3$ )  $\delta$ : 139.5 (C), 134.6 (CH), 133.0 (CH), 130.0 (CH), 129.4 (CH), 119.0 (CH), 116.4 (C), 114.1 (C), 91.9 (C), 89.0 (C); HRMS ( $\text{ESI}^+$ ): calcd. for  $[\text{C}_{14}\text{H}_{11}\text{N}]^+$  requires  $m/z$  193.0891, found 193.0892.

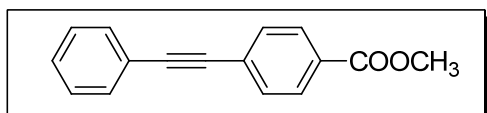

$^1\text{H}$  NMR (400 MHz,  $\text{CDCl}_3$ )  $\delta$ : 8.03 (d,  $J = 8.0$  Hz, 2H, ArH), 7.59 (d,  $J = 8.0$  Hz, 2H, ArH), 7.57–7.54 (m, 2H, ArH), 7.38–7.36 (m, 3H, ArH), 3.92 (s, 3H,  $\text{CH}_3$ );  $^{13}\text{C}$  NMR (100 MHz,  $\text{CDCl}_3$ )  $\delta$ : 168.2 (C), 133.4 (CH), 133.1 (CH), 131.1 (CH), 130.4 (CH), 130.1 (CH), 129.9 (CH), 129.6 (C), 124.3 (C), 94.0 (C), 90.3 (C), 53.9 ( $\text{CH}_3$ ); HRMS ( $\text{ESI}^+$ ): calcd. for  $[\text{C}_{16}\text{H}_{12}\text{O}_2]^+$  requires  $m/z$  236.0837, found 236.0837.

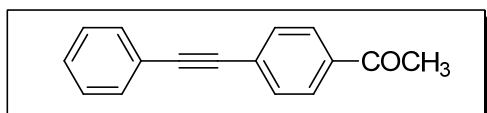

$^1\text{H}$  NMR (400 MHz,  $\text{CDCl}_3$ )  $\delta$ : 7.95 (d,  $J = 8.0$  Hz, 2H, ArH), 7.62 (d,  $J = 8.0$  Hz, 2H, ArH), 7.57–7.56 (m, 2H, ArH), 7.38 (s, 3H, ArH), 2.62 (s, 3H,  $\text{CH}_3$ );  $^{13}\text{C}$  NMR (100 MHz,  $\text{CDCl}_3$ )  $\delta$ : 199.0 (C), 137.7 (C), 133.4 (CH), 133.3 (CH), 130.5 (CH), 130.1 (CH), 129.9 (CH), 129.8 (C), 124.2 (C), 94.3 (C), 90.2 (C), 28.3 ( $\text{CH}_3$ ); HRMS ( $\text{ESI}^+$ ): calcd. for  $[\text{C}_{16}\text{H}_{12}\text{O}]^+$  requires  $m/z$  220.0888, found 220.0887.

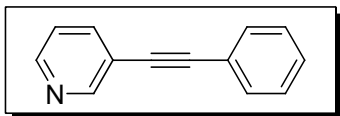

$^1\text{H}$  NMR (400 MHz,  $\text{CDCl}_3$ )  $\delta$ : 8.78 (s, 1H), 8.55 (d,  $J = 4.0$  Hz, 1H, ArH), 7.83–7.80 (m, 1H, ArH), 7.57–7.55 (m, 2H, ArH), 7.38–7.37 (m, 3H, ArH), 7.30–7.28 (m, 1H, ArH);  $^{13}\text{C}$  NMR (100 MHz,  $\text{CDCl}_3$ )  $\delta$ : 152.4 (CH), 148.7 (C), 138.7 (CH), 132.0 (CH), 129.0 (CH), 128.7 (CH), 123.3 (CH), 122.7 (CH), 120.7 (C), 92.9 (C), 86.1 (C); HRMS ( $\text{ESI}^+$ ): calcd. for  $[\text{C}_{13}\text{H}_9\text{N}]^+$  requires  $m/z$  179.0735, found 179.0735.

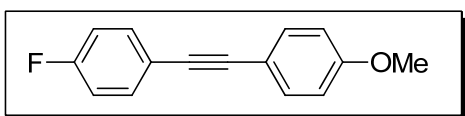

$^1\text{H}$  NMR (400 MHz,  $\text{CDCl}_3$ )  $\delta$ : 6.89 (d,  $J = 8.8$  Hz, 2H, ArH), 7.02–7.06 (m, 2H, ArH), 7.46–7.51 (m, 4H, ArH), 3.84 (s,  $\text{OCH}_3$ );  $^{13}\text{C}$  NMR (75 MHz,  $\text{CDCl}_3$ )  $\delta$ : 164.2 (d,  $J = 247.5$  Hz, C), 159.9 (CH), 133.5 (d,  $J = 7.5$  Hz, CH), 133.2 (CH), 119.9 (C), 115.9 (d,  $J = 22.5$  Hz, CH), 115.4 (C), 114.2 (C), 89.2 (C), 87.2 (C), 55.5 ( $\text{OCH}_3$ ); HRMS ( $\text{ESI}^+$ ): calcd. for  $[\text{C}_{15}\text{H}_{11}\text{FO}]^+$  requires  $m/z$  226.0794, found 226.0794.

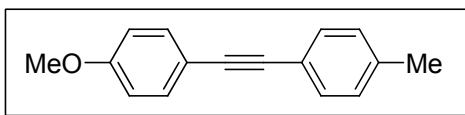

$^1\text{H}$  NMR (300 MHz,  $\text{CDCl}_3$ )  $\delta$ : 7.47–7.39 (m, 4H, ArH), 7.14 (d,  $J = 6.0$  Hz, 2H, ArH), 6.87 (d,  $J = 6.0$  Hz, 2H, ArH), 3.83 (s, 3H,  $\text{OCH}_3$ ), 2.36 (s, 3H,  $\text{CH}_3$ );  $^{13}\text{C}$  NMR (75 MHz,  $\text{CDCl}_3$ )  $\delta$ : 159.7 (C), 138.2 (C), 133.2 (CH), 131.2 (CH), 129.5 (CH), 120.7 (CH), 115.8 (C), 114.2 (C), 88.9 (C), 88.4 (C), 55.5 ( $\text{OCH}_3$ ), 21.7 ( $\text{CH}_3$ ); HRMS ( $\text{ESI}^+$ ): calcd. for  $[\text{C}_{16}\text{H}_{14}\text{O}]^+$  requires  $m/z$  222.1045, found 222.1042.

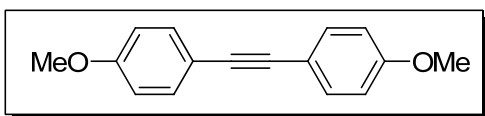

$^1\text{H}$  NMR (300 MHz,  $\text{CDCl}_3$ )  $\delta$ : 7.15 (d,  $J = 9.0$  Hz, 4H, ArH), 6.85 (d,  $J = 9.0$  Hz, 4H, ArH), 3.81 (s, 6H,  $\text{OCH}_3$ );  $^{13}\text{C}$  NMR (75 MHz,  $\text{CDCl}_3$ )  $\delta$ : 159.6 (C), 133.1 (C), 115.9 (CH), 114.2 (CH),

88.2 (C), 55.5 (OCH<sub>3</sub>); HRMS (ESI<sup>+</sup>): calcd. for [C<sub>16</sub>H<sub>14</sub>O<sub>2</sub>]<sup>+</sup> requires m/z 238.0994, found 238.0990.

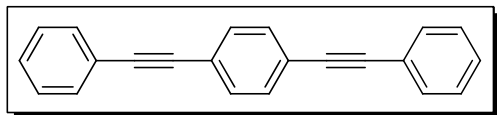

<sup>1</sup>H NMR (400 MHz, CDCl<sub>3</sub>) δ: 7.53–7.56 (m, 8H), 7.38 (s, 6H); <sup>13</sup>C NMR (100 MHz, CDCl<sub>3</sub>) δ: 133.3 (C), 133.2 (C), 130.1 (CH), 130.0 (CH), 124.7 (CH), 124.6 (CH), 92.9 (C), 90.7 (C); HRMS (ESI<sup>+</sup>): calcd. for [C<sub>22</sub>H<sub>14</sub>]<sup>+</sup> requires m/z 278.1096, found 278.1091.

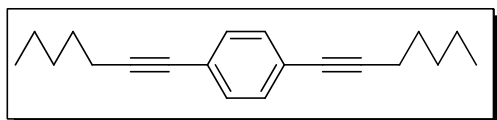

<sup>1</sup>H NMR (400 MHz, CDCl<sub>3</sub>) δ: 7.31 (s, 4H), 2.40 (t, *J* = 7.2 Hz, 4H), 1.57–1.64 (m, 4H), 1.33–1.47 (m, 8H), 0.93 (t, *J* = 7.2 Hz, 6H); <sup>13</sup>C NMR (100 MHz, CDCl<sub>3</sub>) δ: 131.6 (C), 123.4 (CH), 92.2 (C), 80.6 (C), 31.4 (CH<sub>2</sub>), 28.7 (CH<sub>2</sub>), 22.5 (CH<sub>2</sub>), 19.7 (CH<sub>2</sub>), 14.3 (CH<sub>3</sub>); HRMS (ESI<sup>+</sup>): calcd. for [C<sub>20</sub>H<sub>26</sub>]<sup>+</sup> requires m/z 266.2035, found 266.2032.

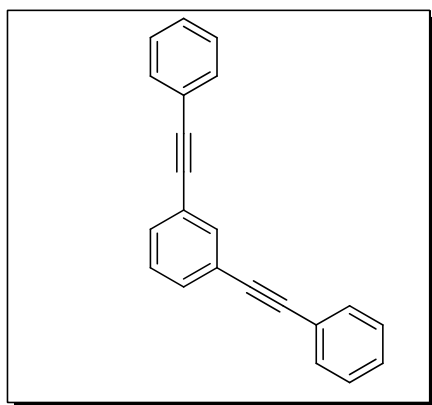

<sup>1</sup>H NMR (400 MHz, CDCl<sub>3</sub>) δ: 7.32–7.39 (m, 7H), 7.49 (d, *J* = 7.6 Hz, 2H), 7.54 (t, *J* = 7.6 Hz, 4H), 7.72 (s, 1H); <sup>13</sup>C NMR (100 MHz, CDCl<sub>3</sub>) δ: 136.2 (CH), 133.3 (CH), 132.9 (CH), 130.1 (CH), 130.1 (CH), 130.1 (CH), 125.2 (C), 124.6 (C), 91.6 (C), 90.2 (C); HRMS (ESI<sup>+</sup>): calcd. for [C<sub>22</sub>H<sub>14</sub>]<sup>+</sup> requires m/z 278.1096, found 278.1096.

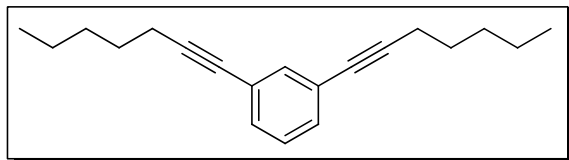

<sup>1</sup>H NMR (400 MHz, CDCl<sub>3</sub>)  $\delta$ : 7.43 (s, 1H), 7.28 (d,  $J = 7.6$  Hz, 2H), 7.19 (t,  $J = 7.6$  Hz, 1H), 2.38 (t,  $J = 7.2$  Hz, 4H), 1.58–1.61 (m, 4H), 1.33–1.46 (m, 8H), 0.92 (t,  $J = 7.2$  Hz, 6H); <sup>13</sup>C NMR (100 MHz, CDCl<sub>3</sub>)  $\delta$ : 134.8 (C), 130.8 (CH), 128.3 (CH), 124.4 (CH), 91.1 (C), 80.2 (C), 31.4 (CH<sub>2</sub>), 28.6 (CH<sub>2</sub>), 22.5 (CH<sub>2</sub>), 19.6 (CH<sub>2</sub>), 14.3 (CH<sub>3</sub>); HRMS (ESI<sup>+</sup>): calcd. for [C<sub>20</sub>H<sub>26</sub>]<sup>+</sup> requires  $m/z$  266.2035, found 266.2037.

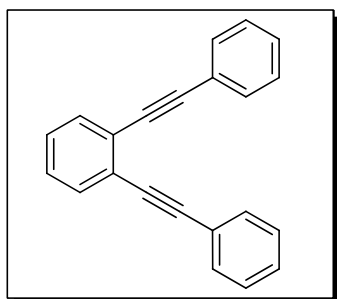

<sup>1</sup>H NMR (400 MHz, CDCl<sub>3</sub>)  $\delta$ : 7.59–7.63 (m, 6H), 7.37–7.38 (m, 6H), 7.33–7.35 (m, 2H); <sup>13</sup>C NMR (100 MHz, CDCl<sub>3</sub>)  $\delta$ : 133.4 (C), 133.3 (C), 130.1 (CH), 130.0 (CH), 129.6 (CH), 127.5 (CH), 124.9 (CH), 95.3 (C), 90.0 (C); HRMS (ESI<sup>+</sup>): calcd. for [C<sub>22</sub>H<sub>14</sub>]<sup>+</sup> requires  $m/z$  278.1096, found 278.1093.

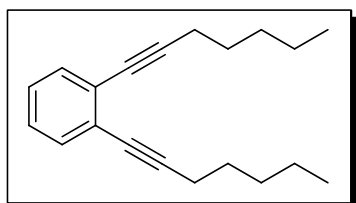

<sup>1</sup>H NMR (400 MHz, CDCl<sub>3</sub>)  $\delta$ : 7.37–7.40 (m, 2H), 7.17–7.19 (m, 2H), 2.47 (t,  $J = 7.2$  Hz, 4H), 1.61–1.69 (m, 4H), 1.33–1.52 (m, 8H), 0.94 (t,  $J = 7.2$  Hz, 6H); <sup>13</sup>C NMR (100 MHz, CDCl<sub>3</sub>)  $\delta$ : 133.4 (C), 128.7 (CH), 127.9 (CH), 95.8 (C), 81.2 (C), 32.7 (CH<sub>2</sub>), 30.2 (CH<sub>2</sub>), 23.9 (CH<sub>2</sub>), 21.3 (CH<sub>2</sub>), 15.7 (CH<sub>3</sub>); HRMS (ESI<sup>+</sup>): calcd. for [C<sub>20</sub>H<sub>26</sub>]<sup>+</sup> requires  $m/z$  266.2035, found 266.2036.

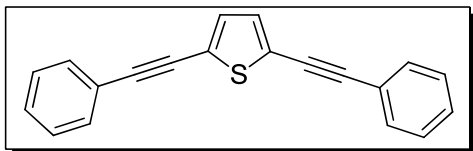

$^1\text{H}$  NMR (400 MHz,  $\text{CDCl}_3$ )  $\delta$ : 7.51–7.53 (m, 4H), 7.35–7.37 (m, 6H), 7.16 (s, 2H);  $^{13}\text{C}$  NMR (100MHz,  $\text{CDCl}_3$ )  $\delta$ : 133.5 (C), 133.1 (C), 130.3 (CH), 130.1 (CH), 126.24 (CH), 124.2 (CH), 95.7 (C), 83.9 (C); HRMS (ESI $^+$ ): calcd. for  $[\text{C}_{20}\text{H}_{12}\text{S}]^+$  requires  $m/z$  284.0660, found 284.0660.

## Copy of HRMS and NMR Spectra for desired products:

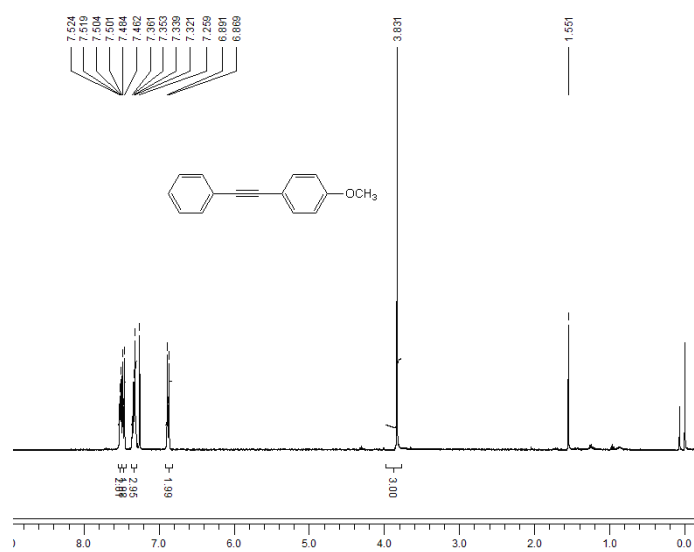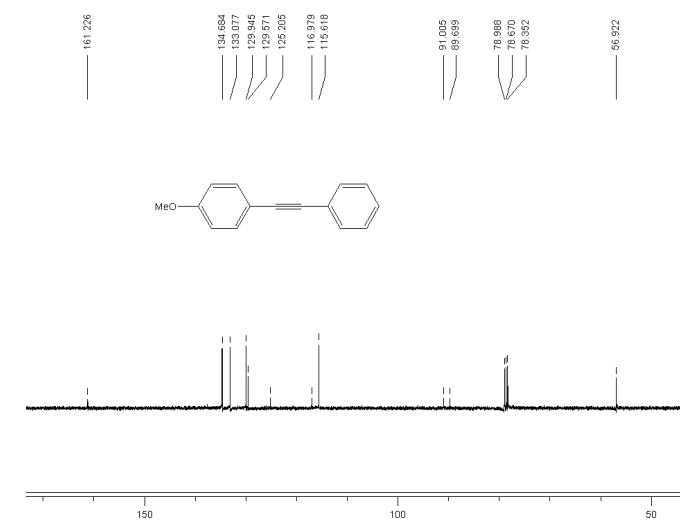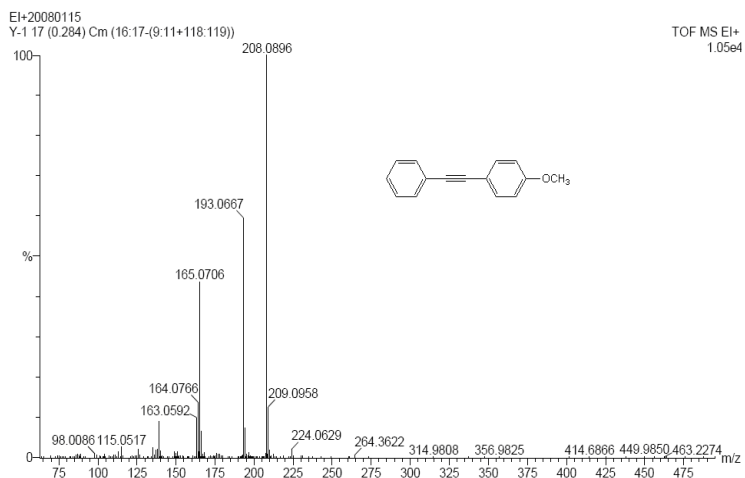

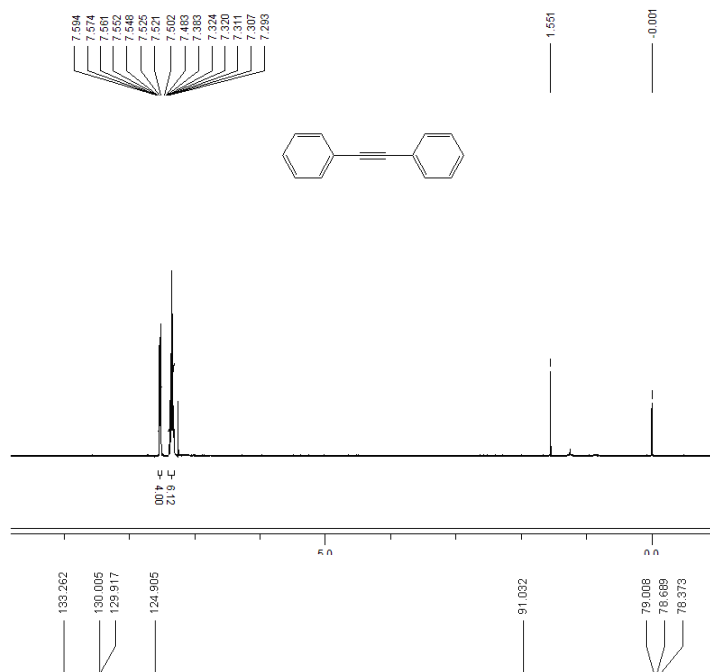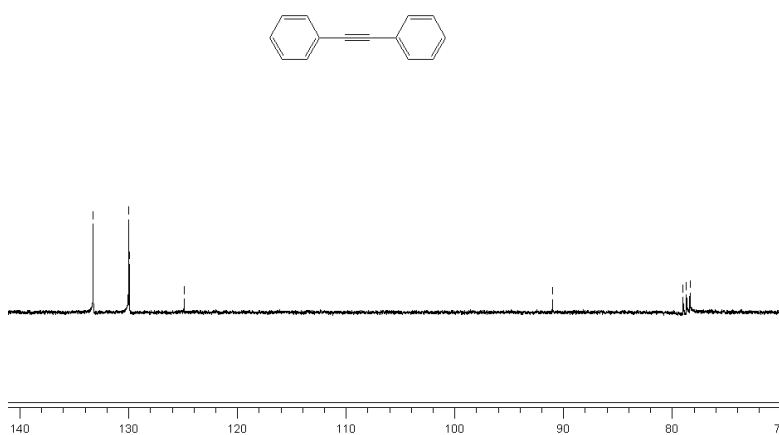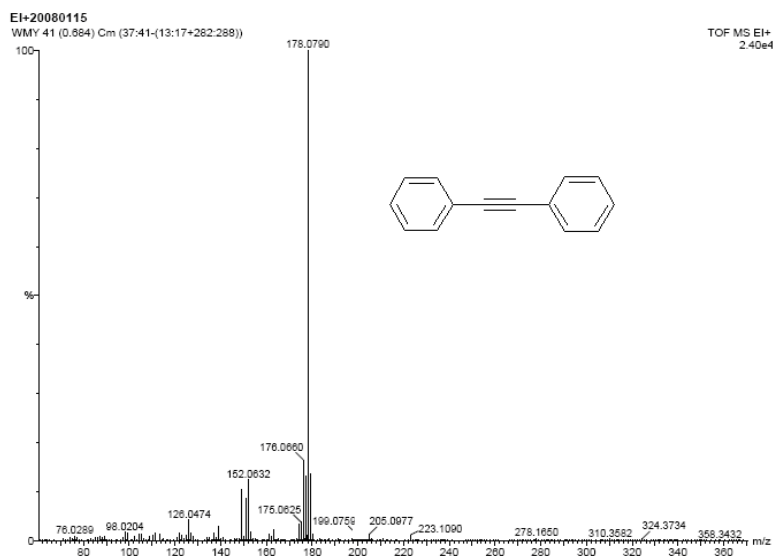

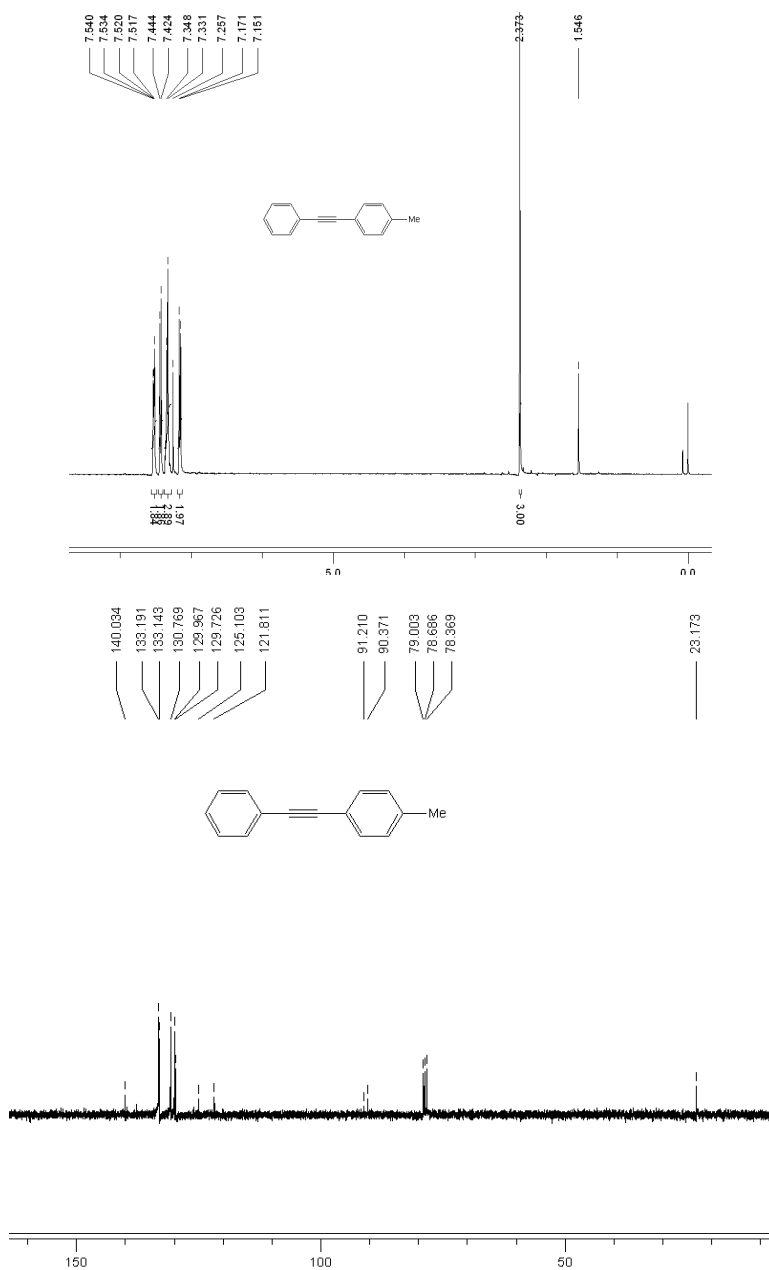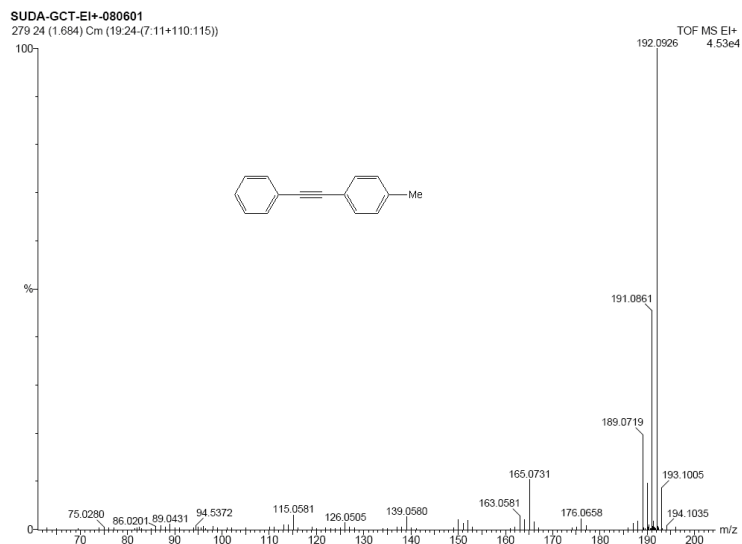











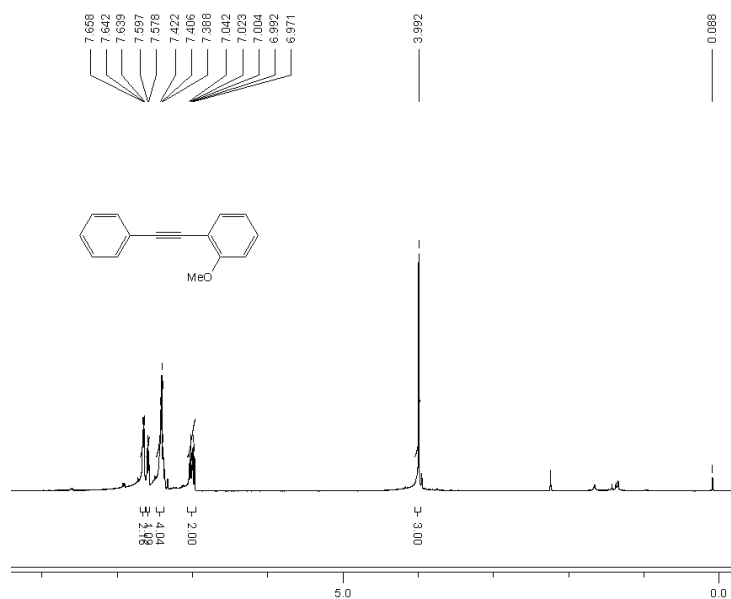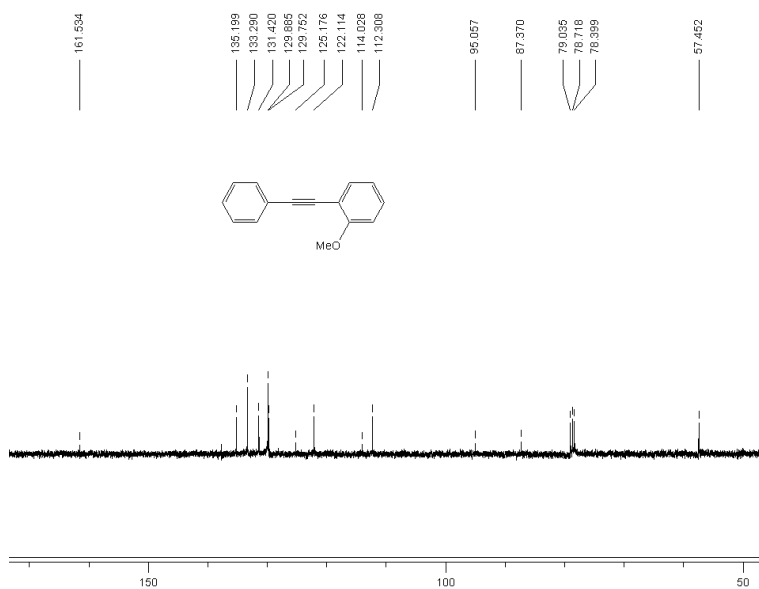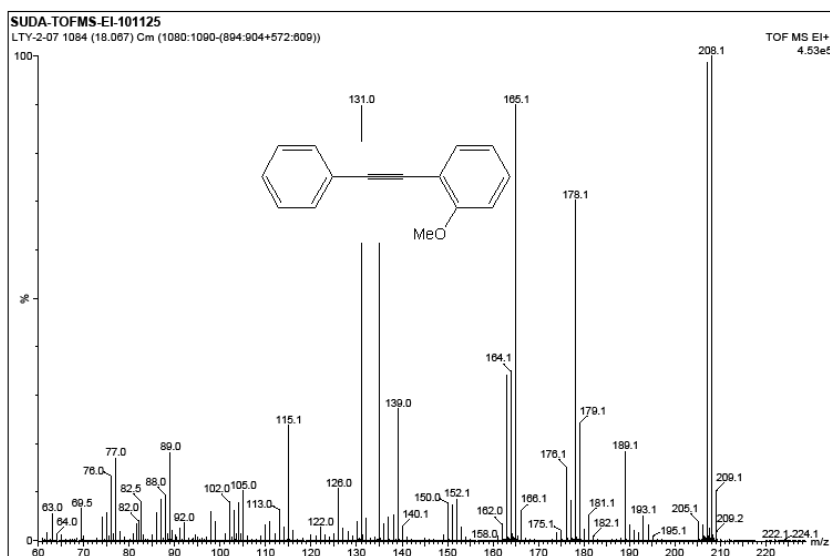

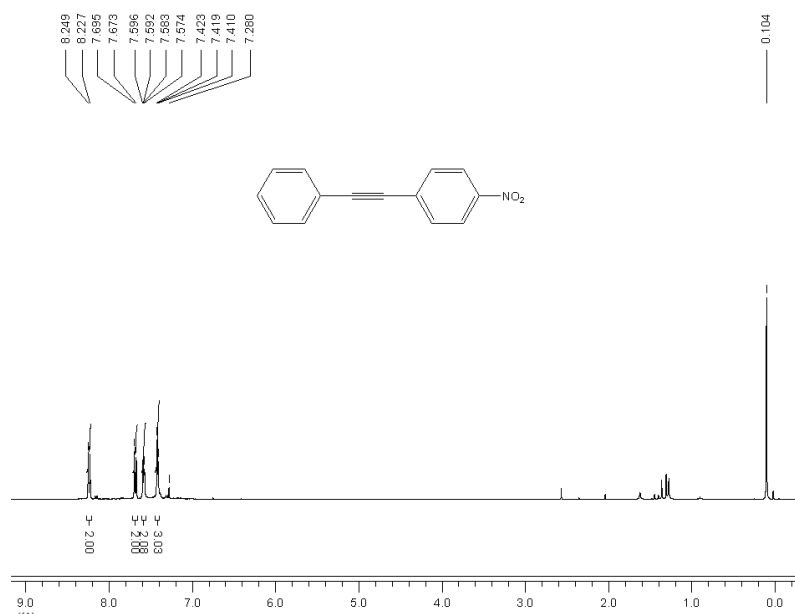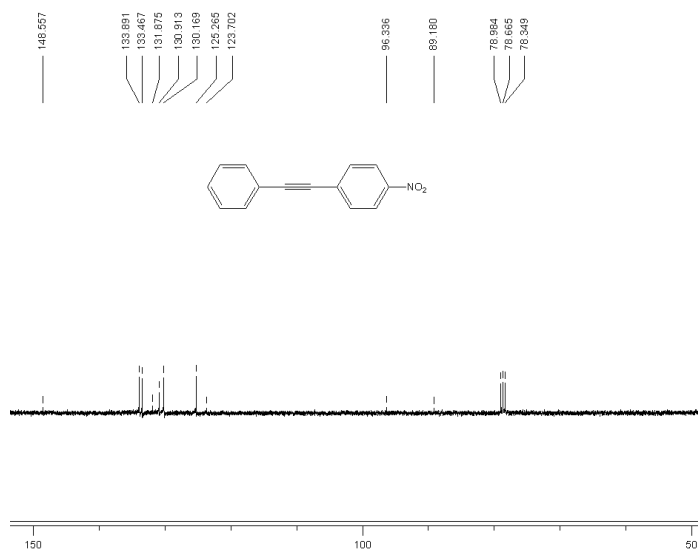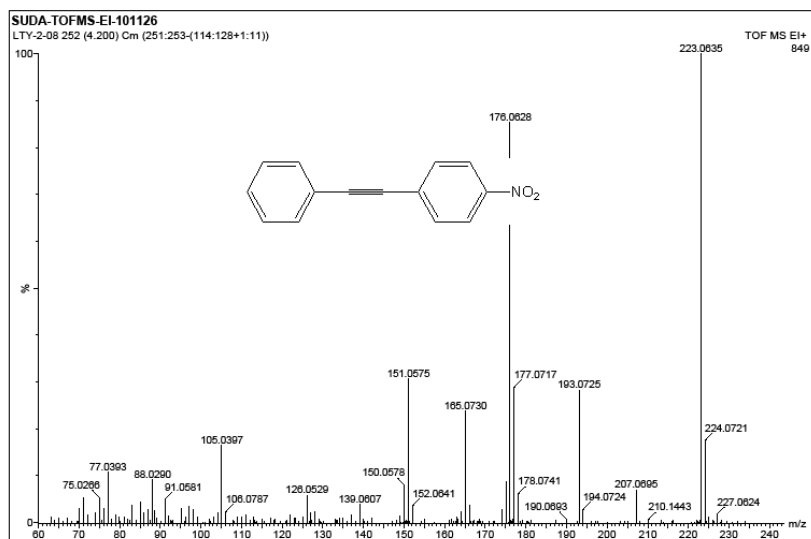

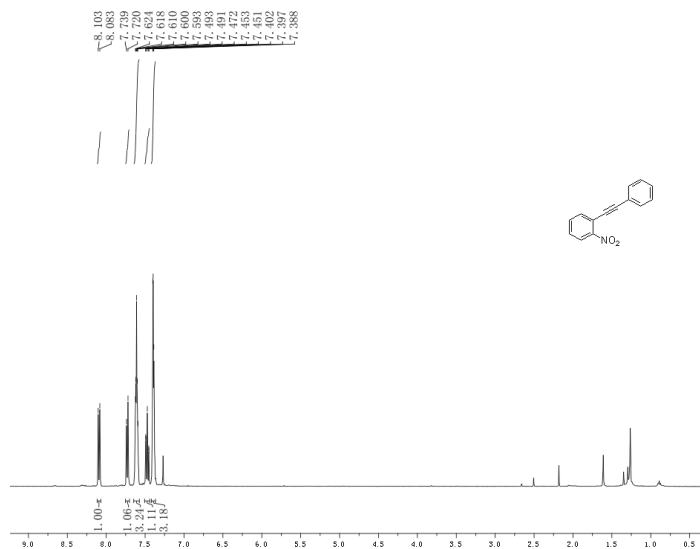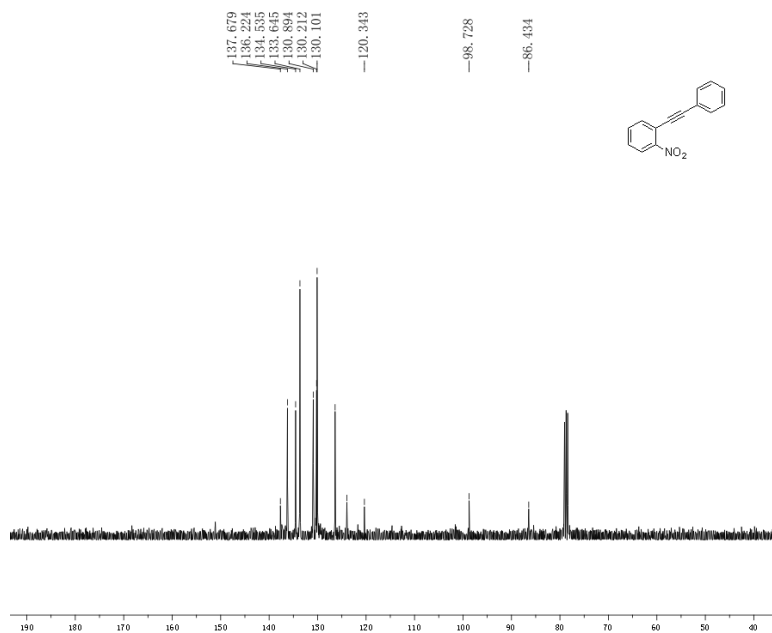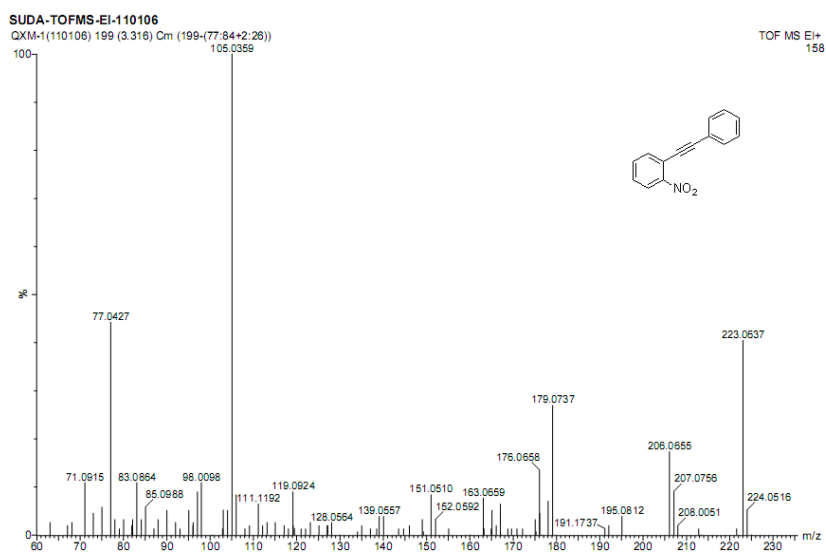

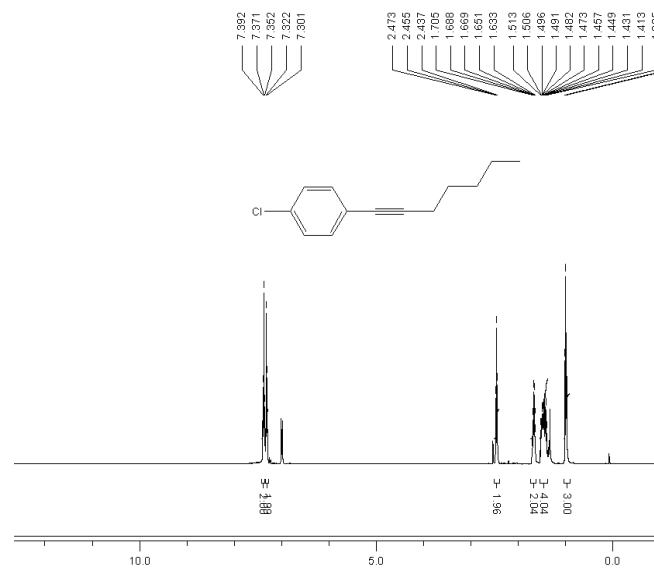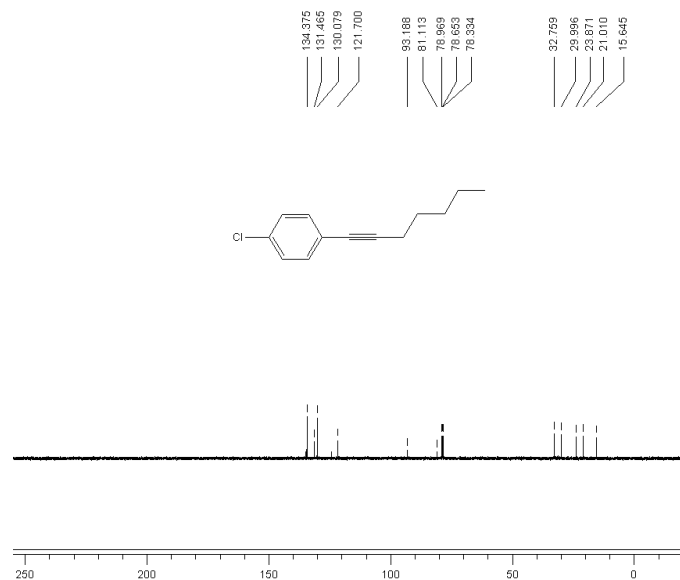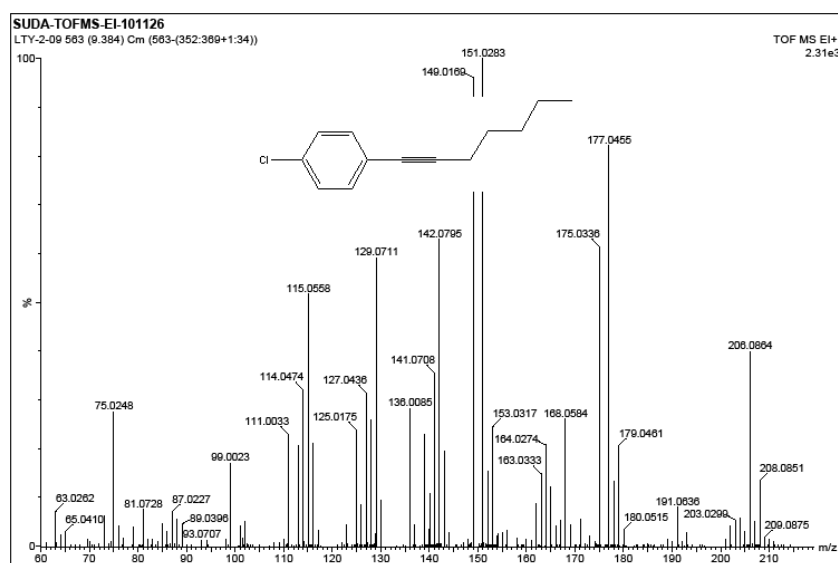



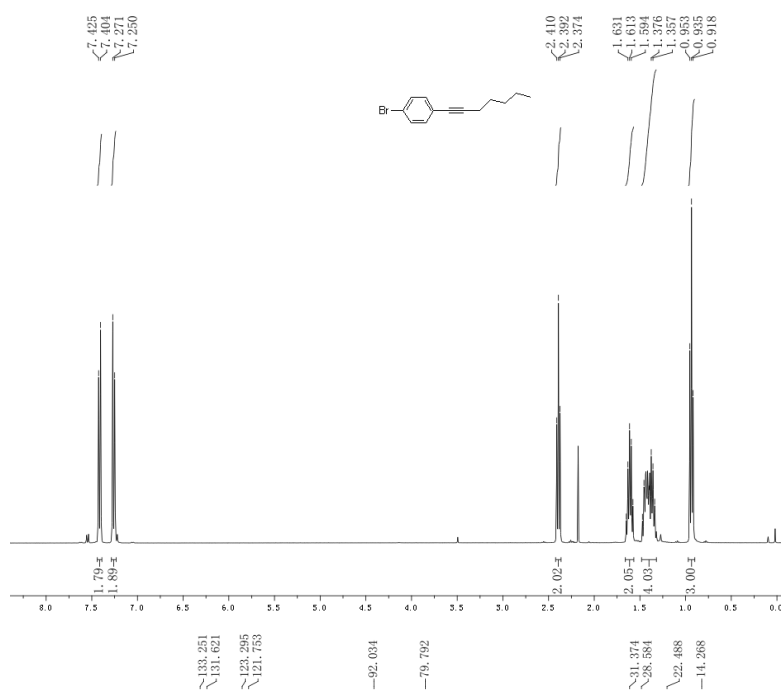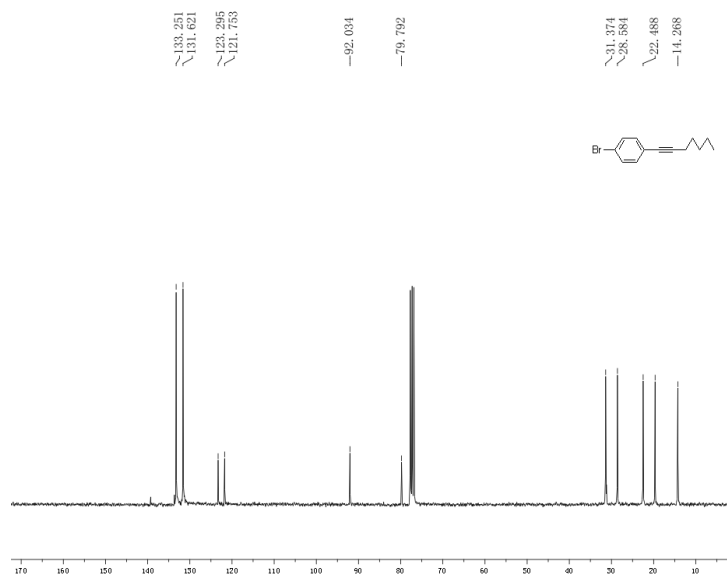

SUDA-TOFMS-EI-110106

QXM-3(110106) 455 (7.584) Cm (454:455-(348:356+298:303))

TOF MS EI+  
791

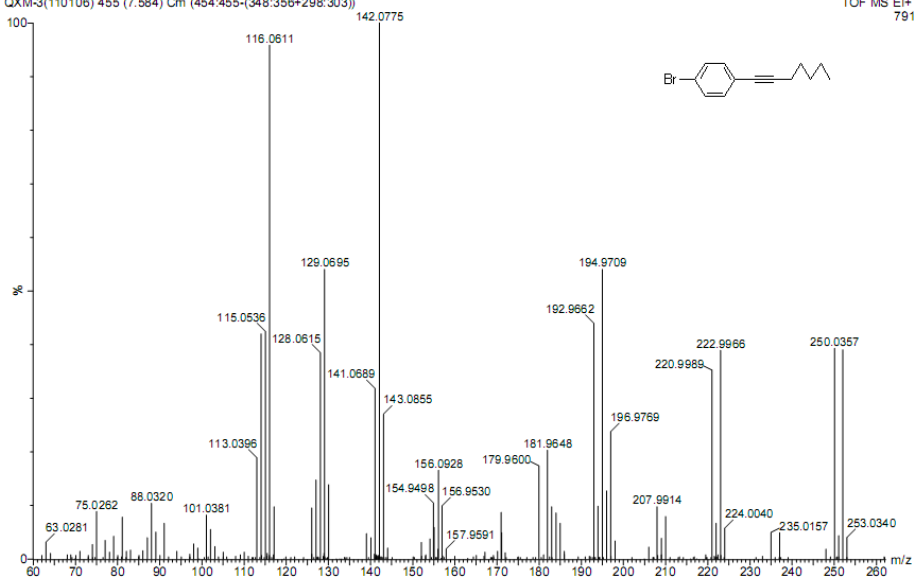

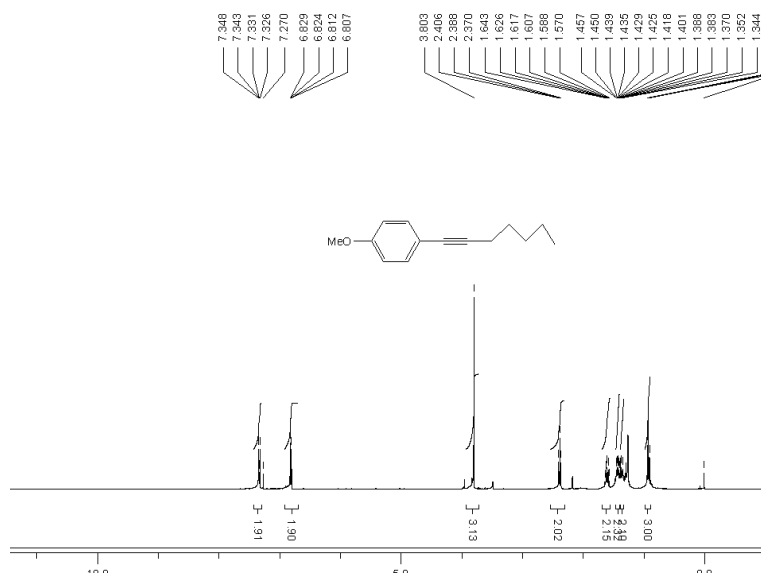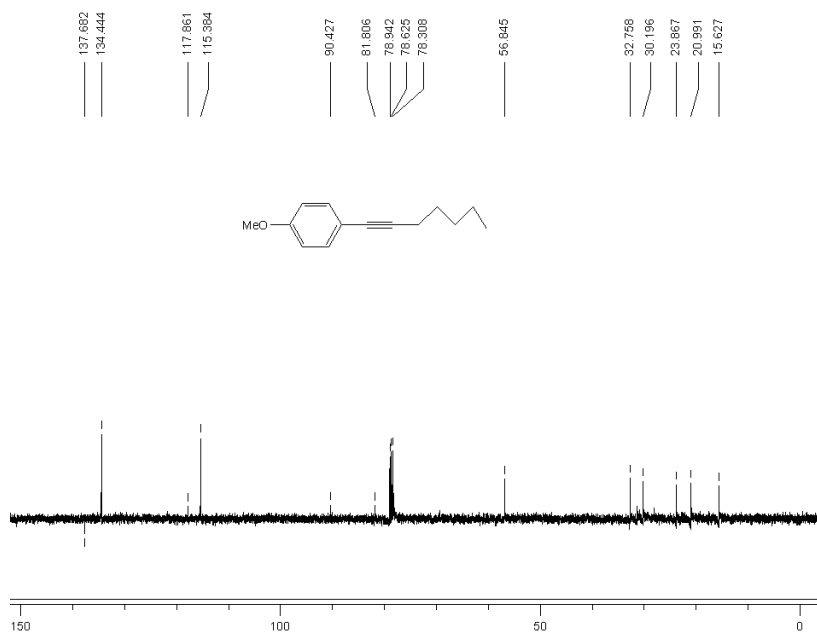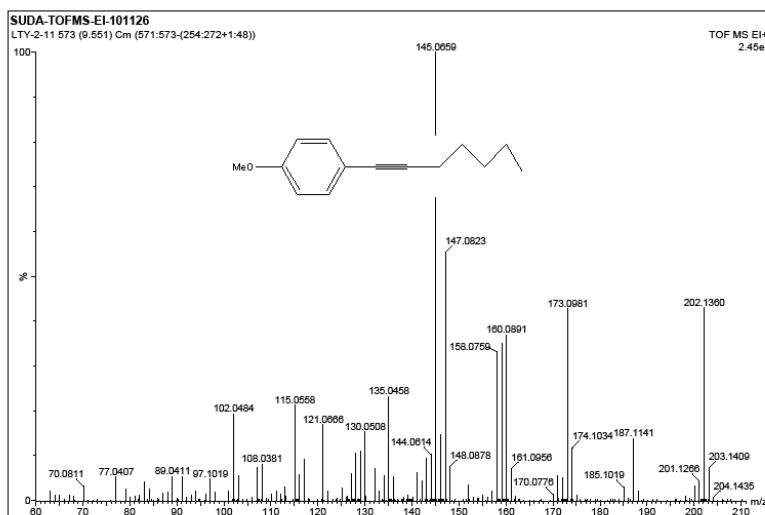

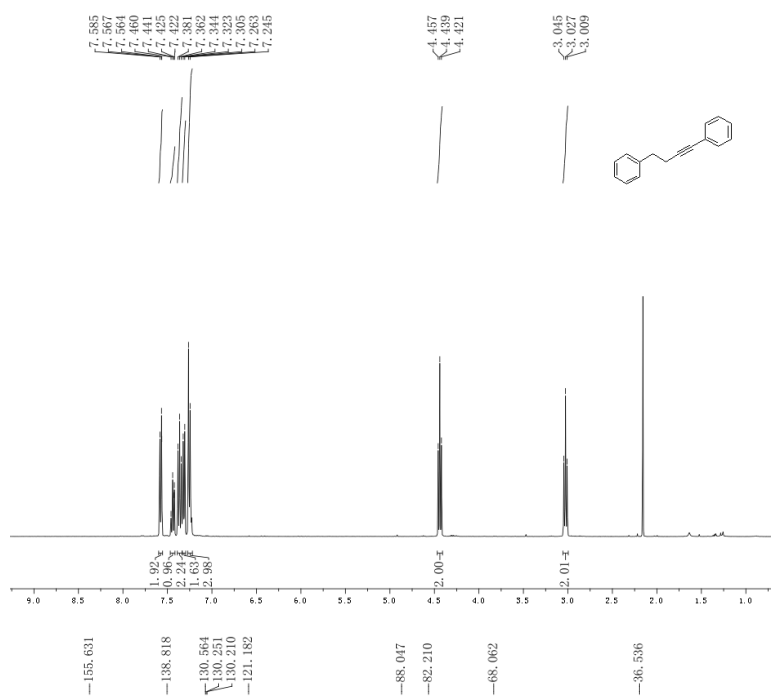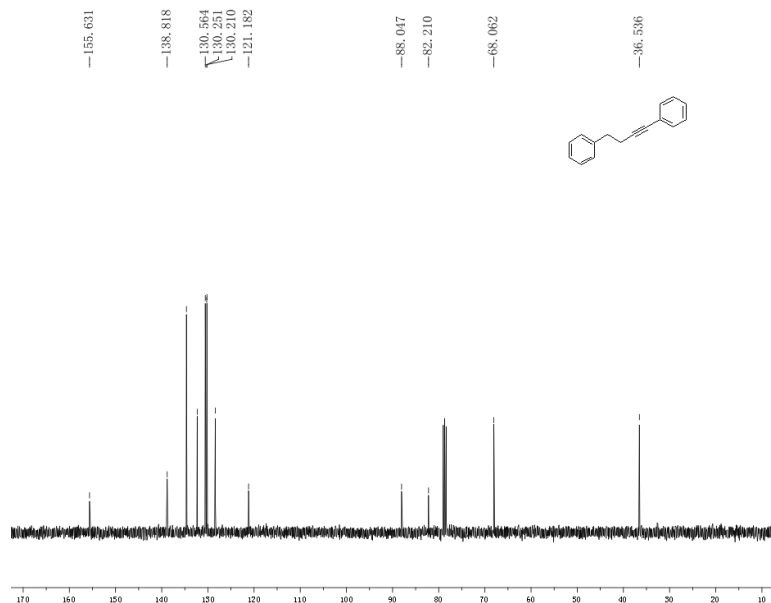

SUDA-TOFMS-EI-101215

QX-M-1 909 (15.151) Cm (909.911-(649.888+143))

TOF MS EI+  
5.44e4

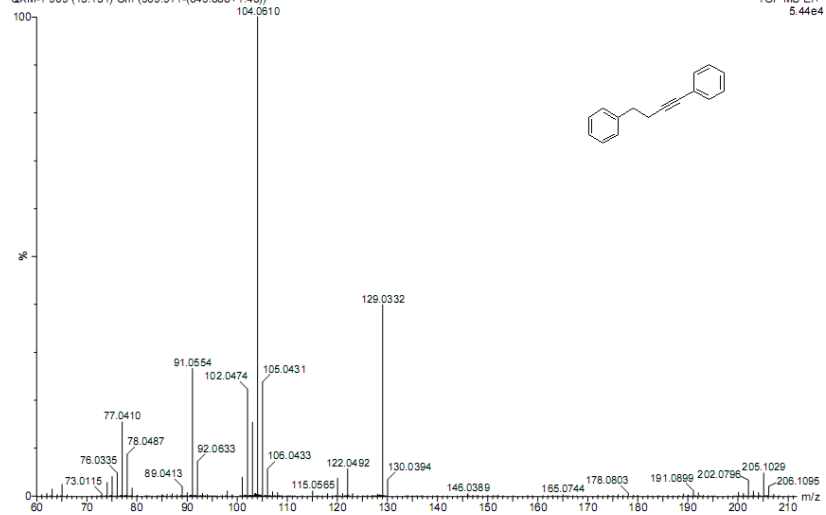





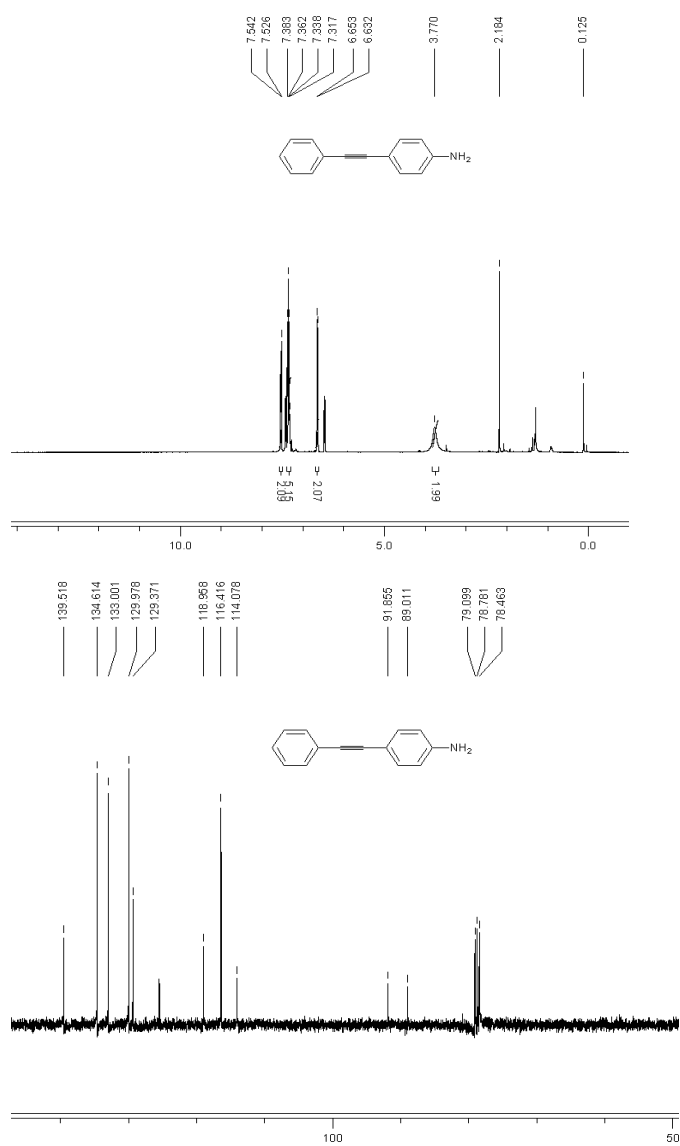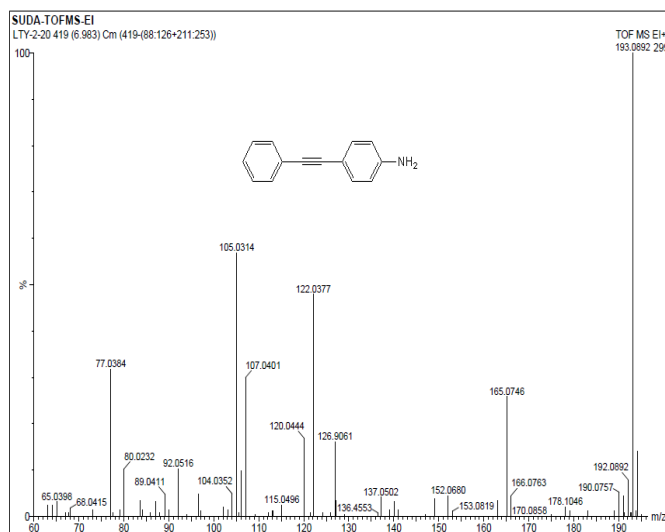

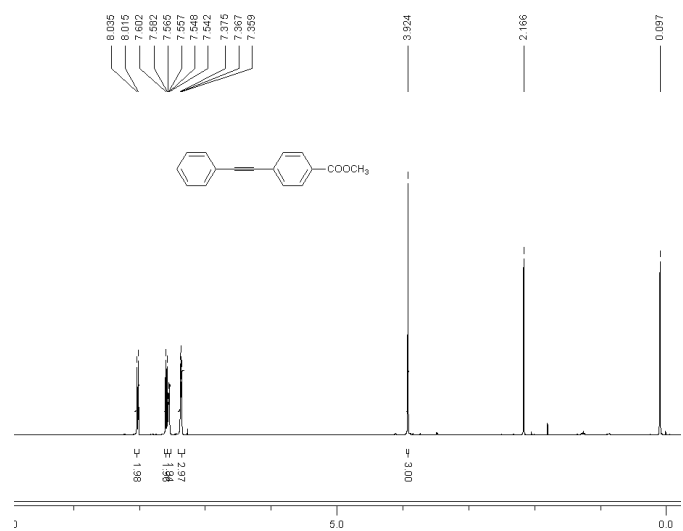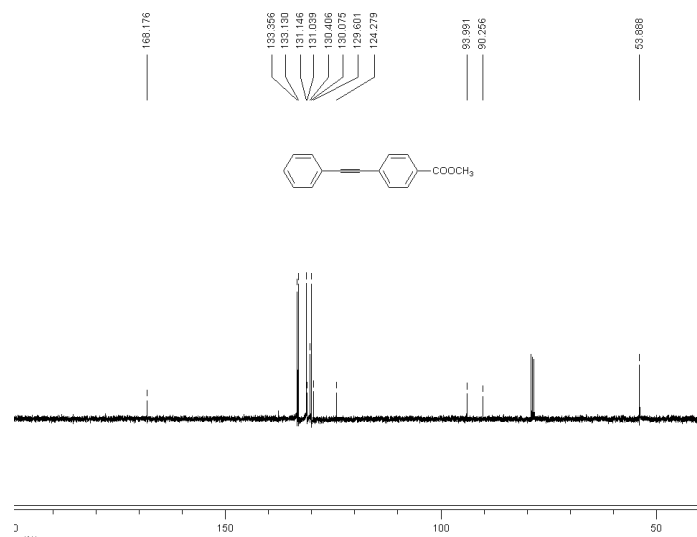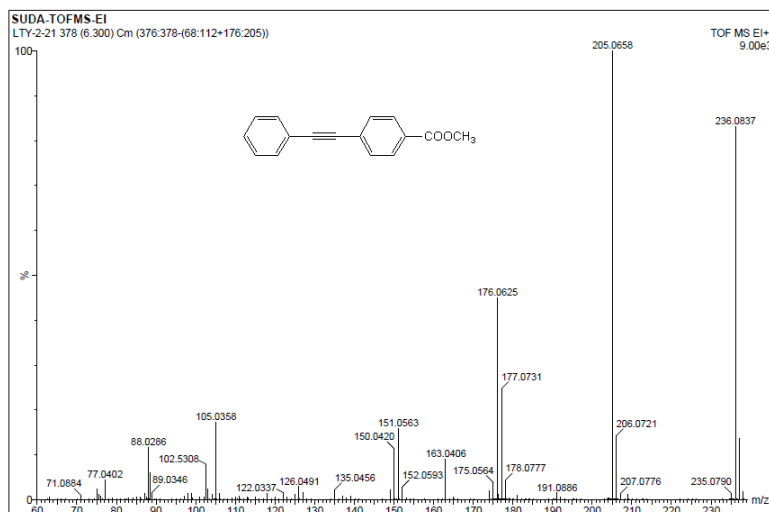

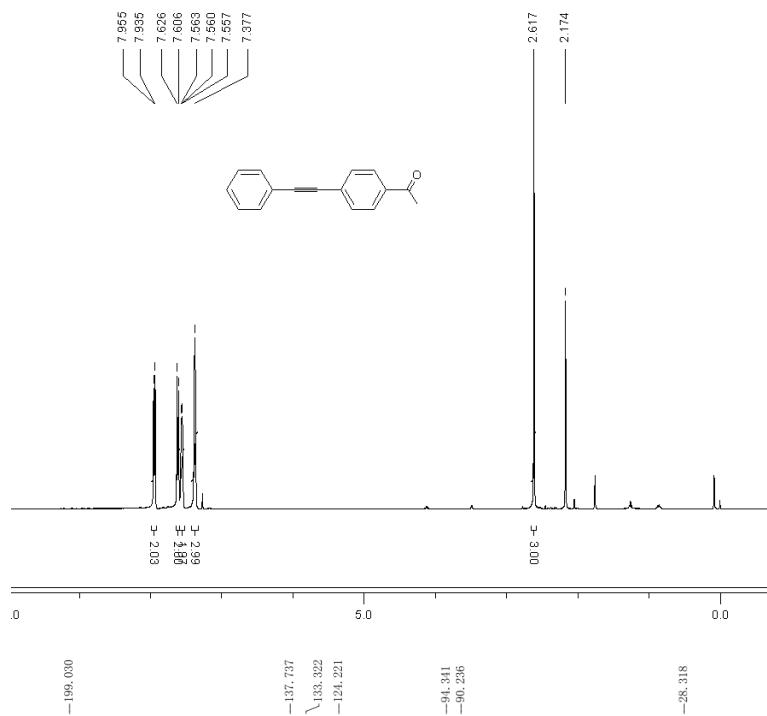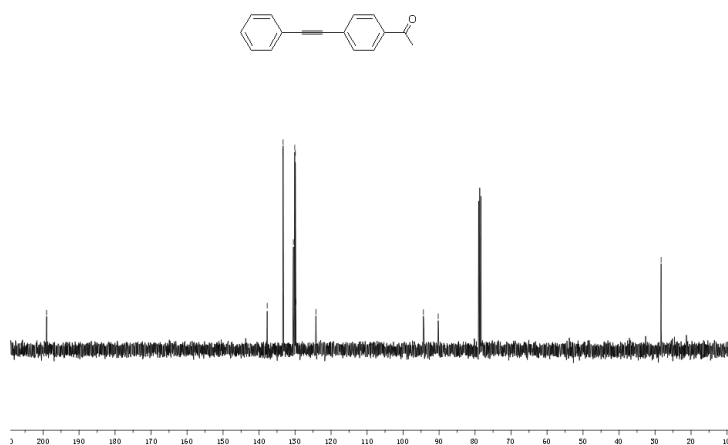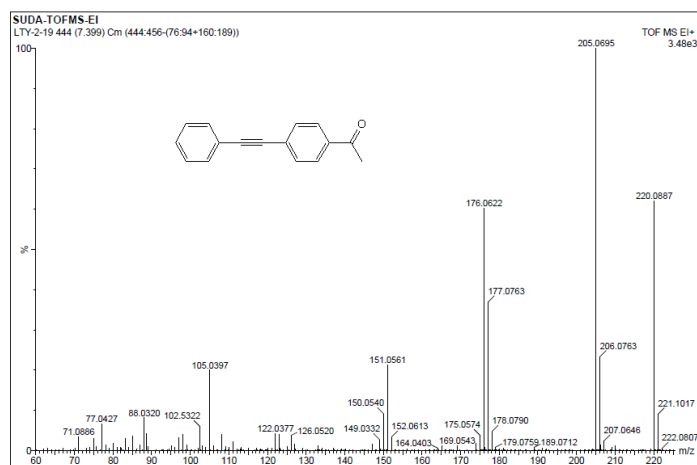



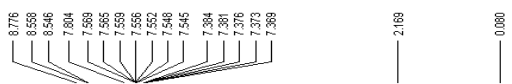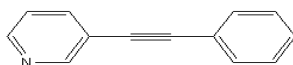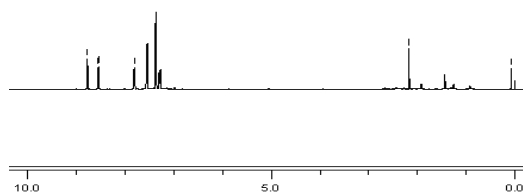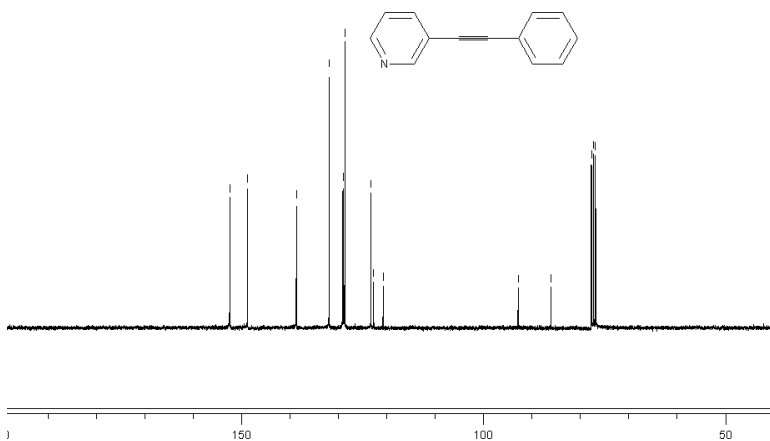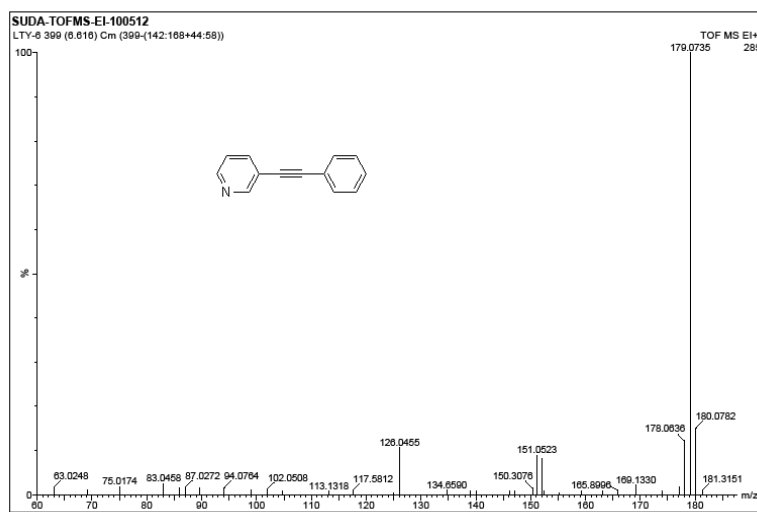

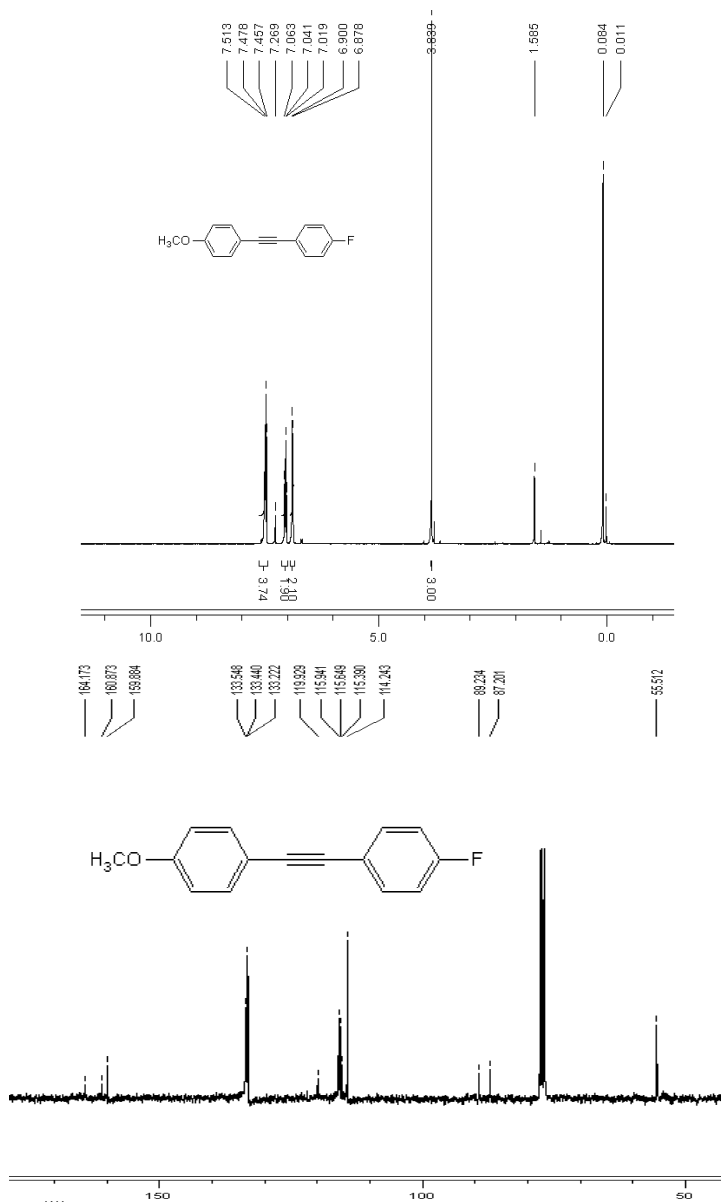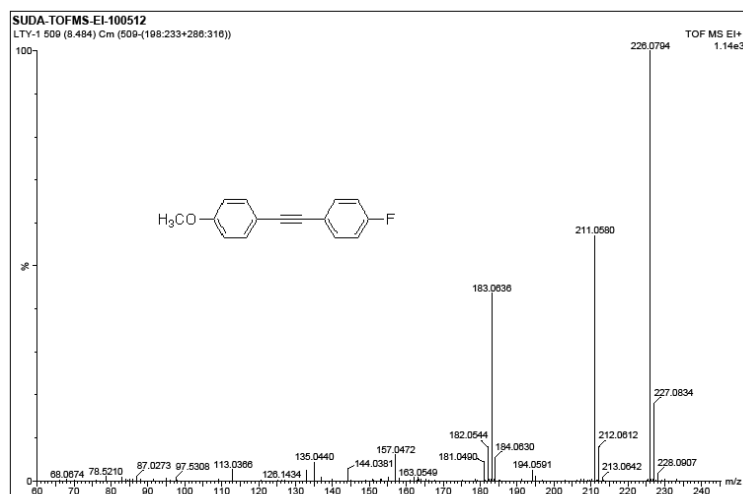



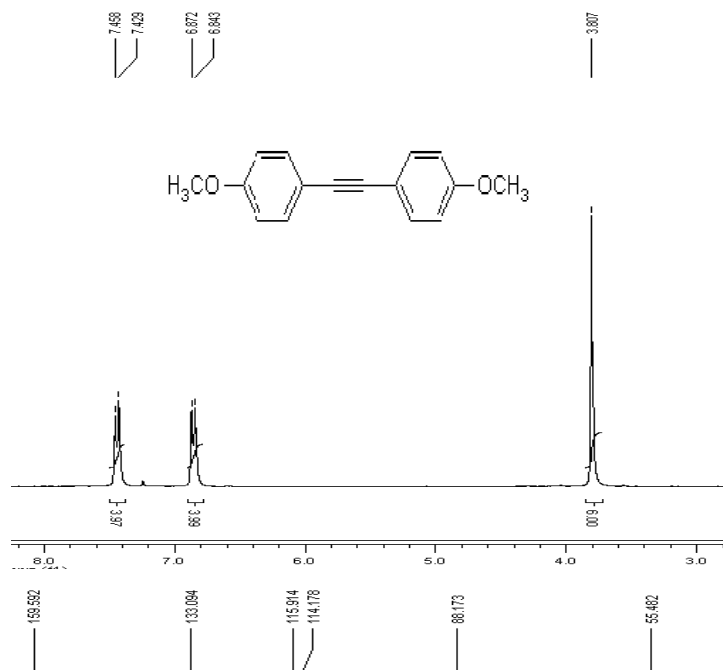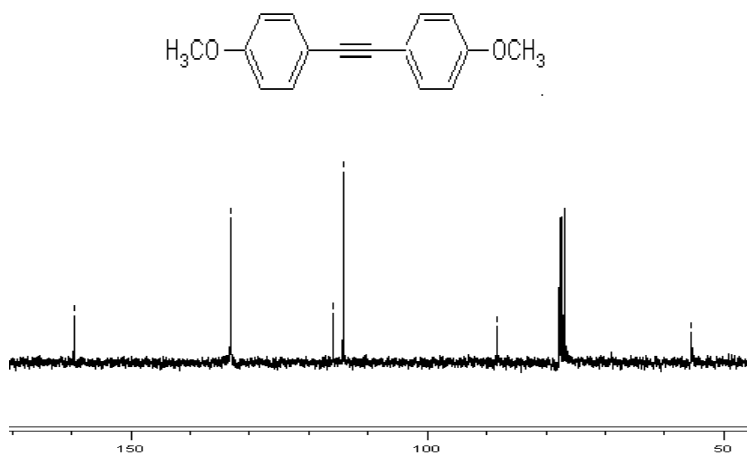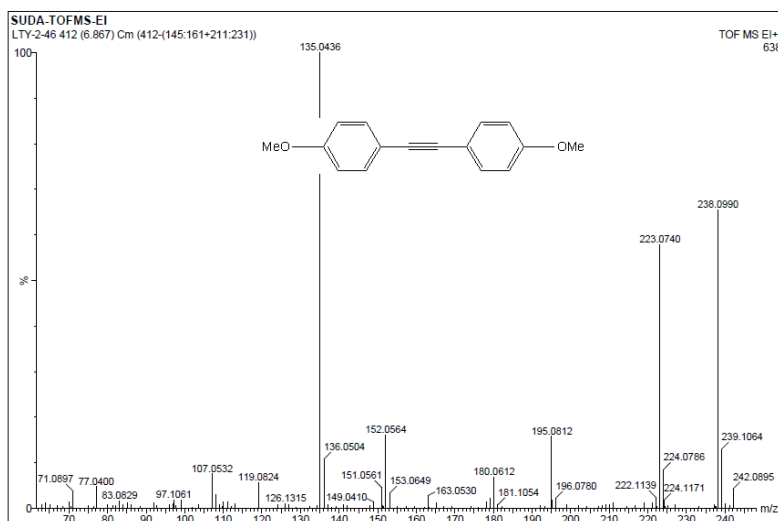

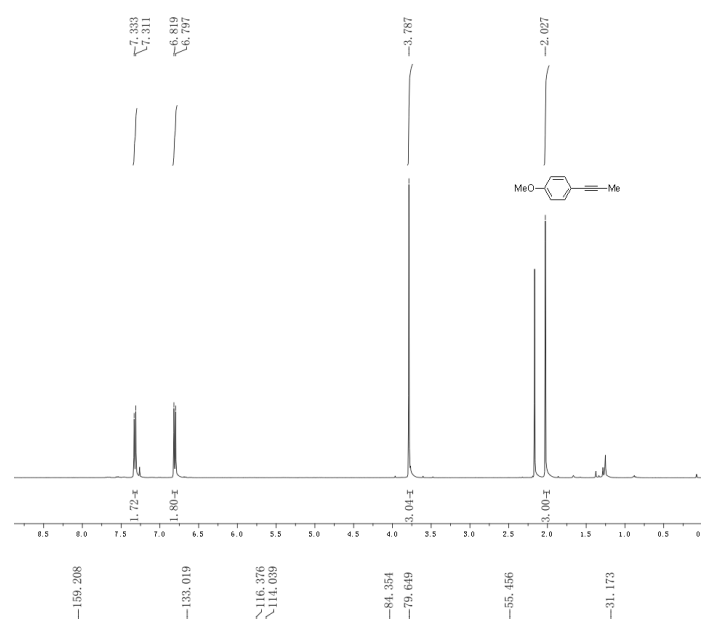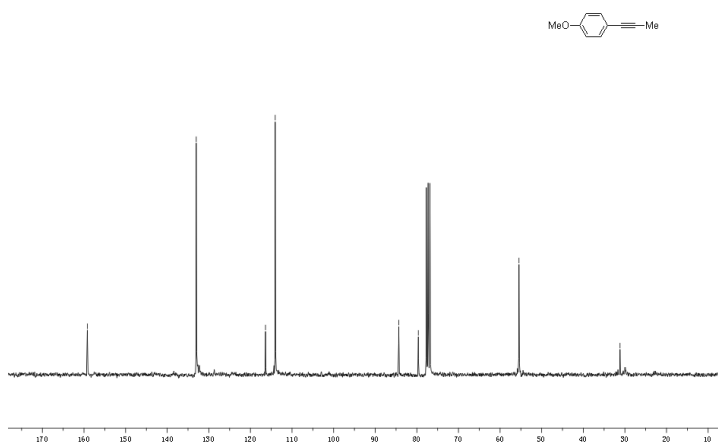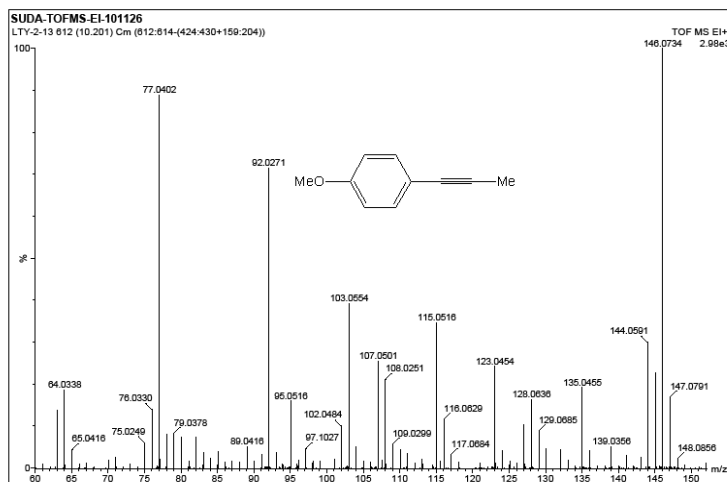

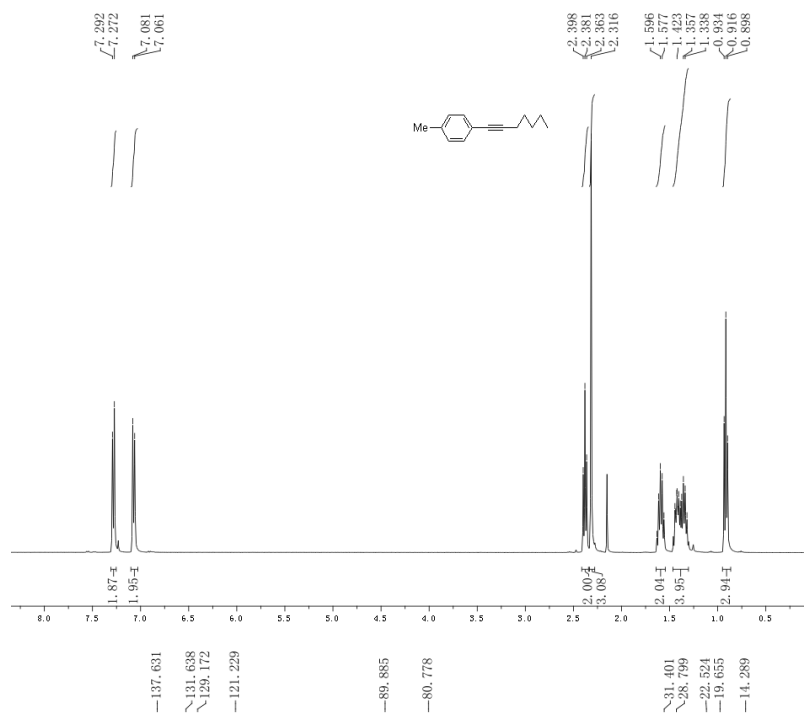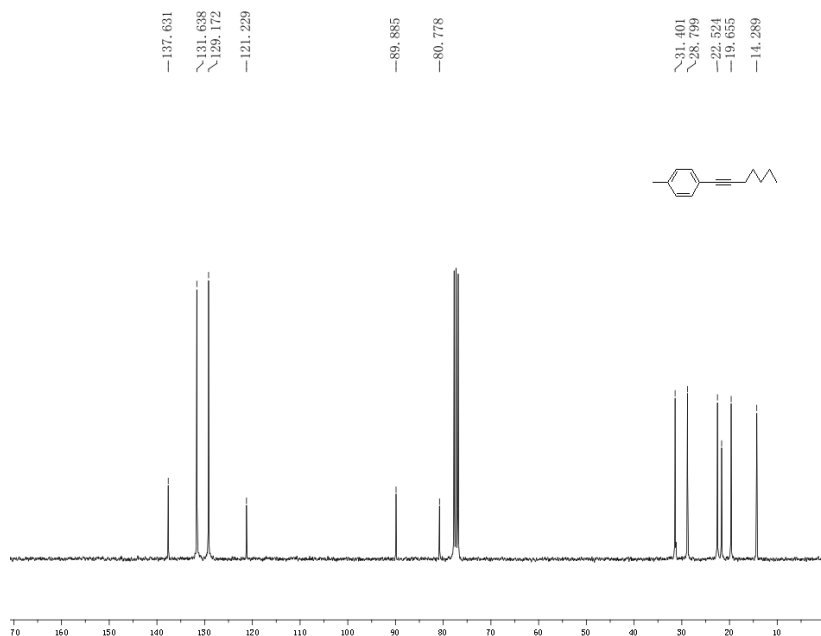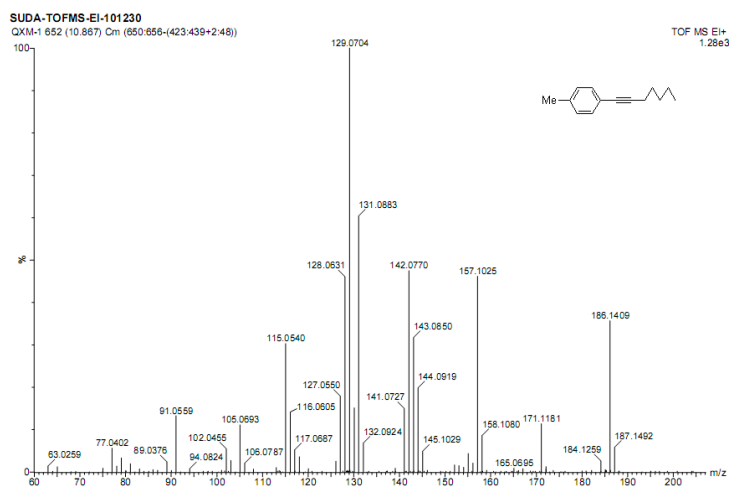

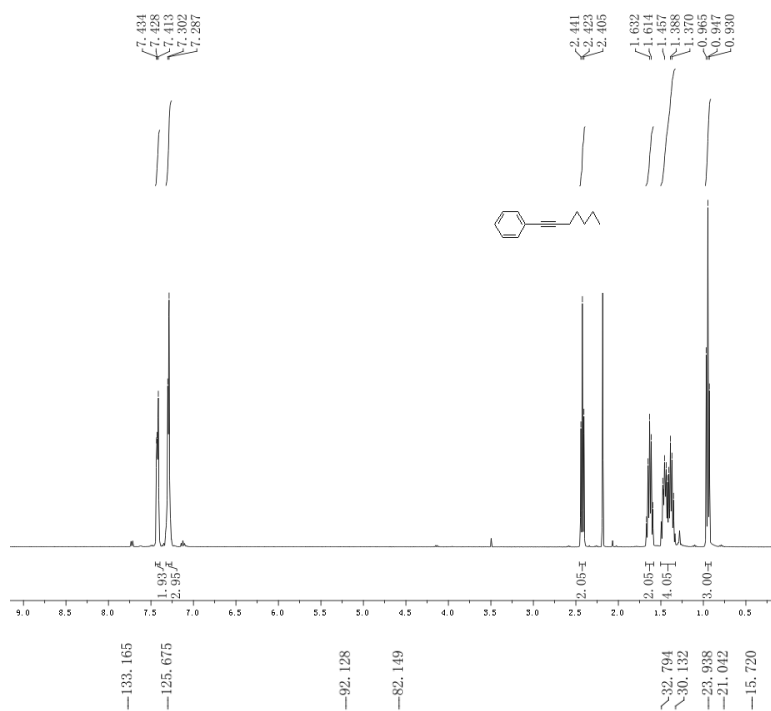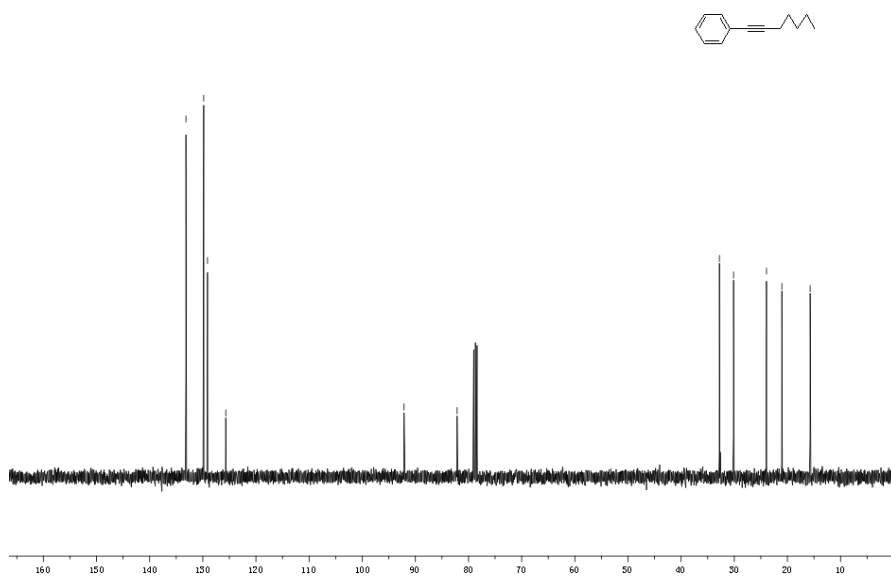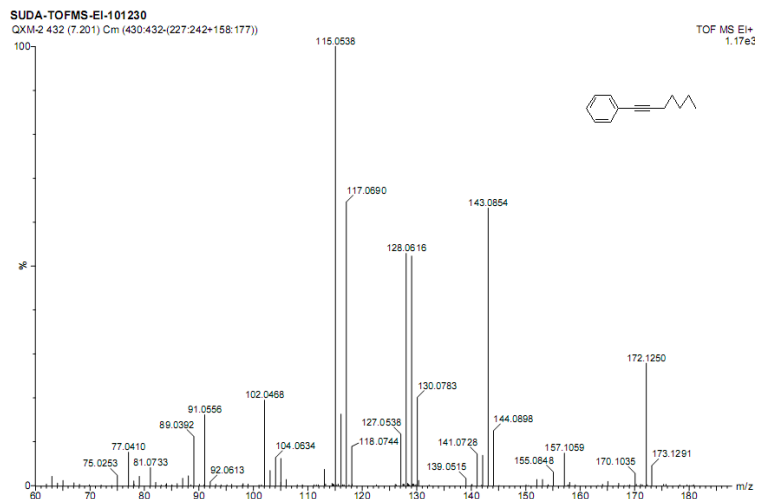

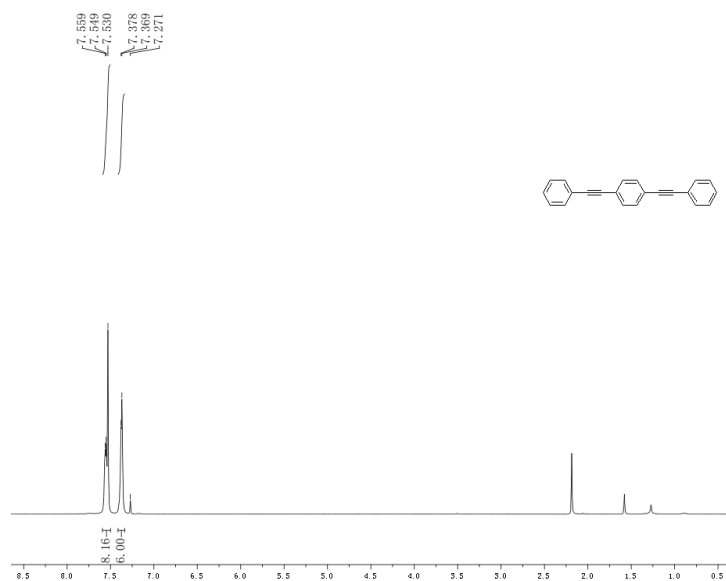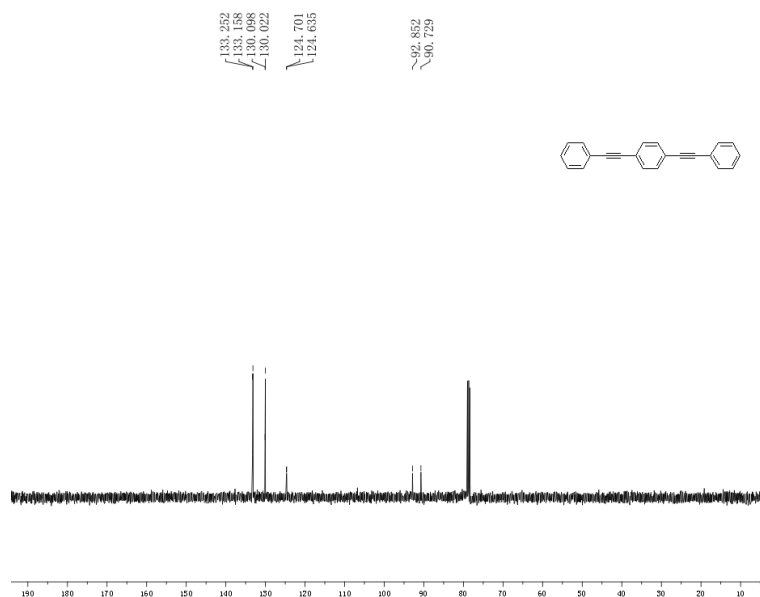

SUDA-TOFMS-EI-101230  
QXM-3 636 (10.585) Cm (636-(501:506+398:411))

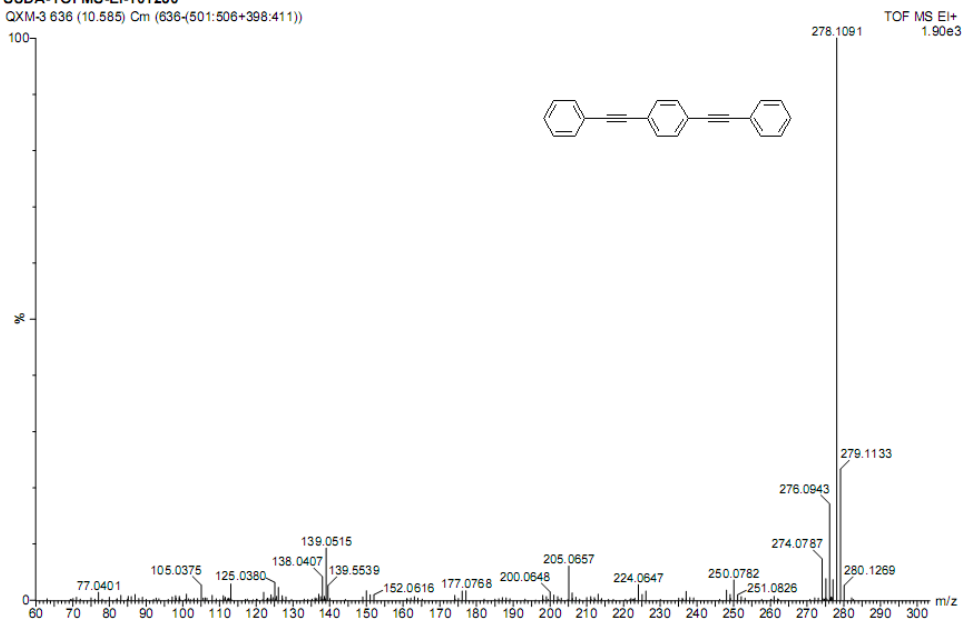



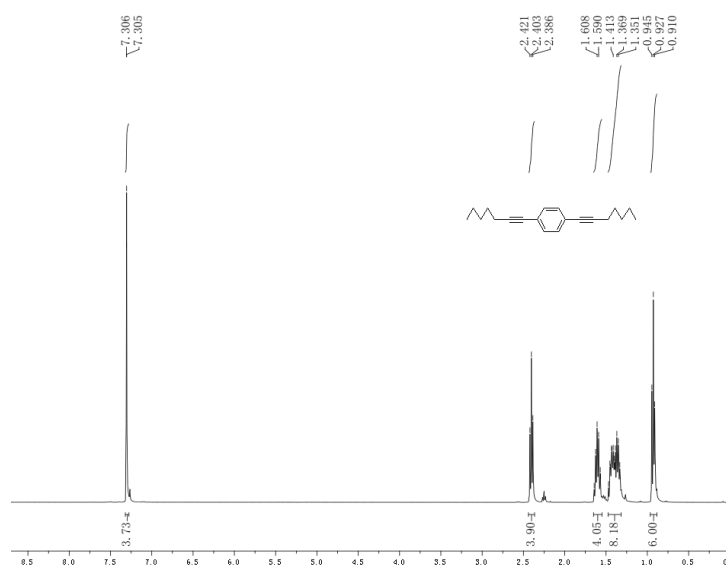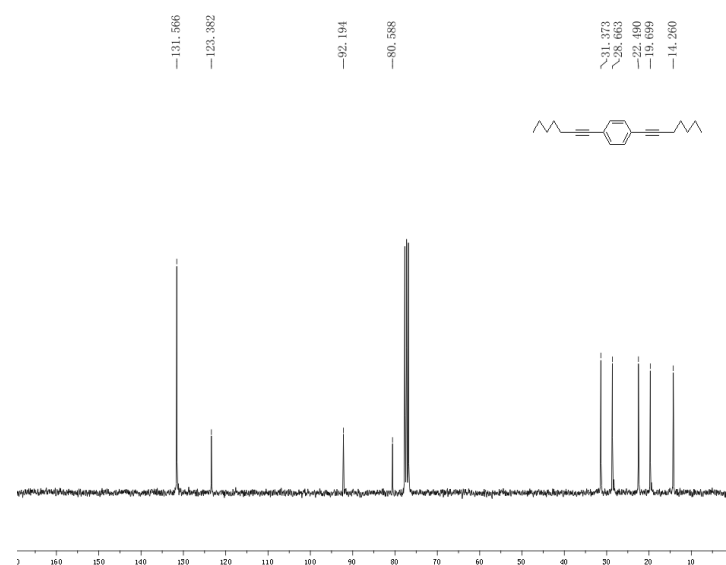

SUDA-TOFMS-EI-101230

QXM-4 583 (9.717) Cm (580:583-(489:497+418:425))

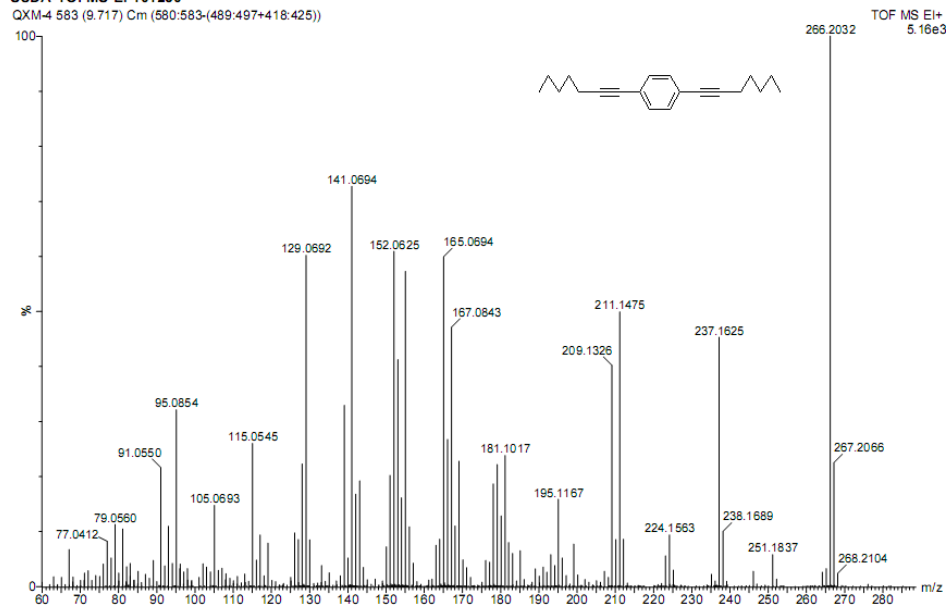

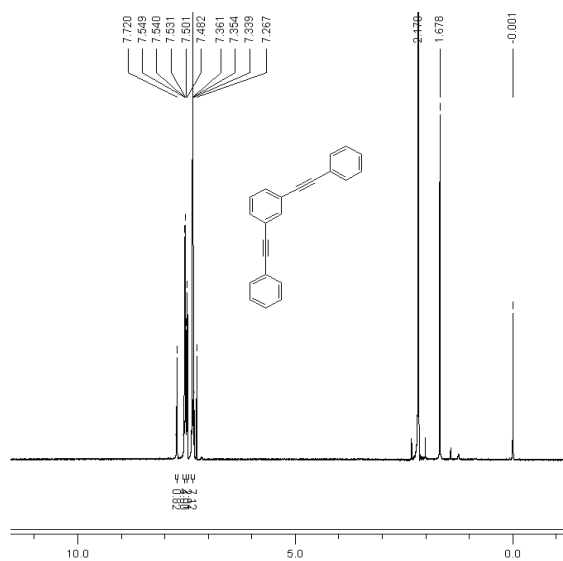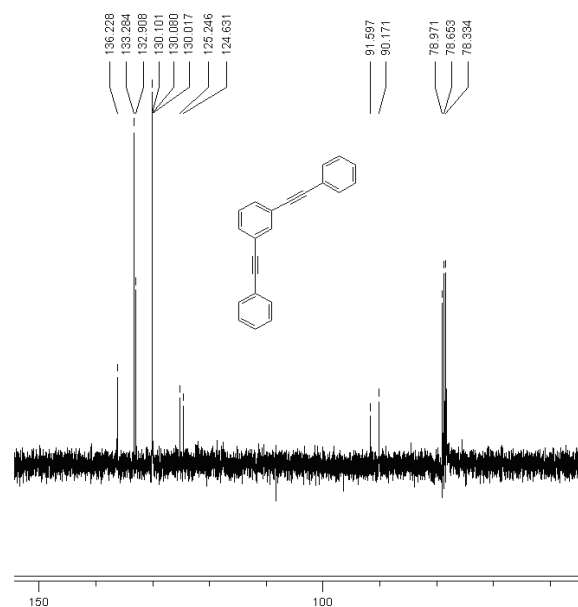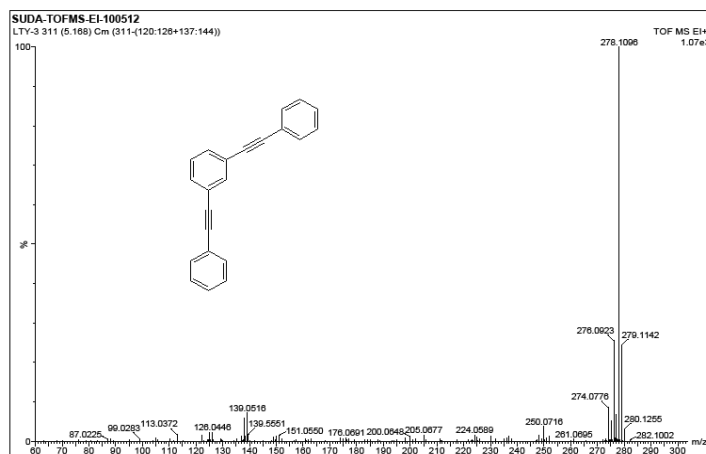

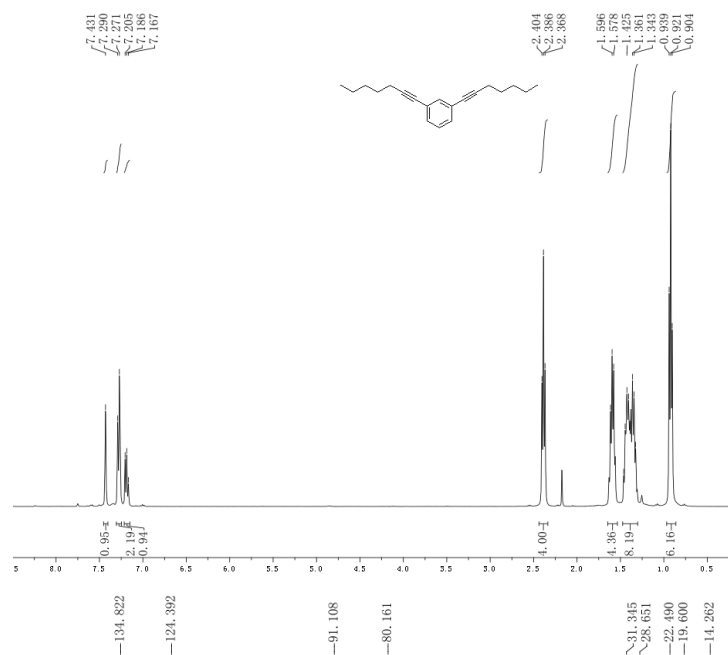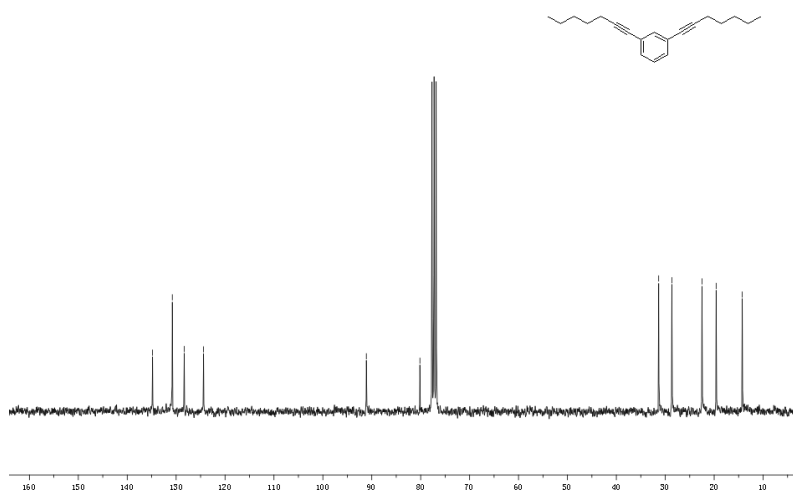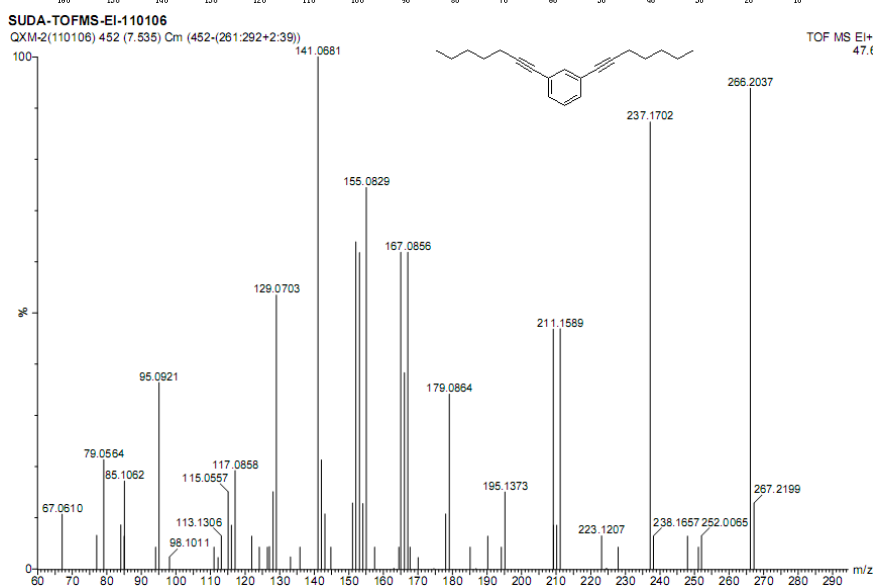

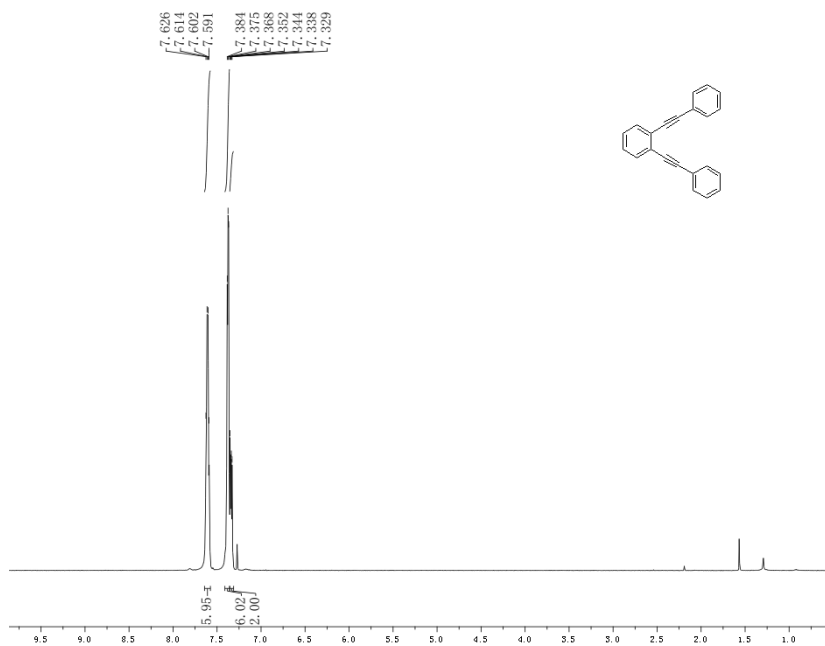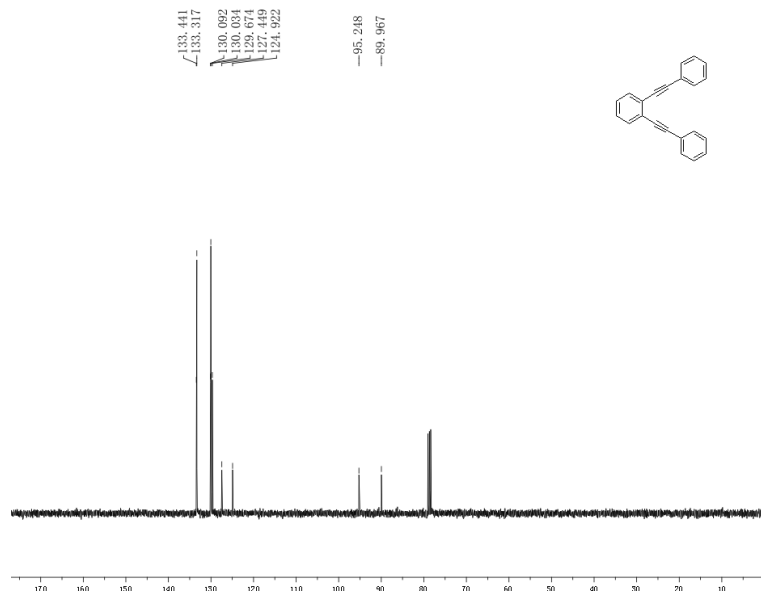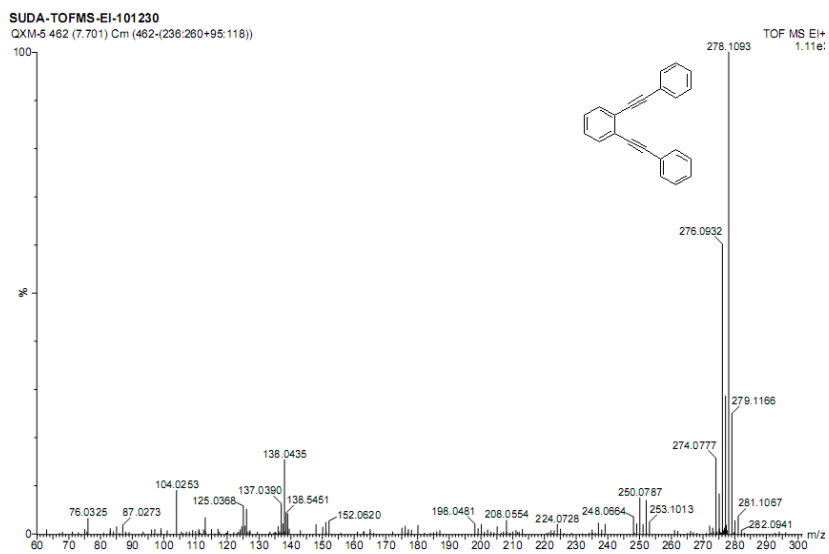

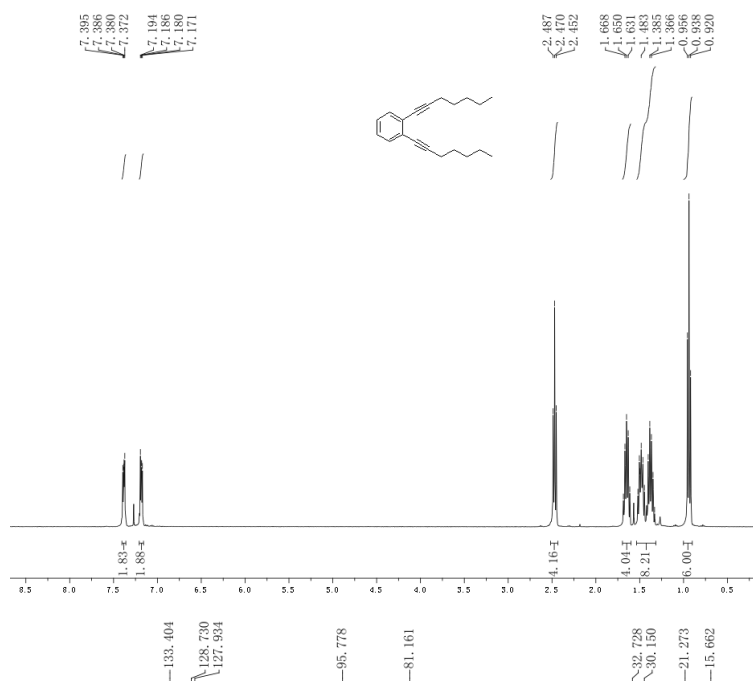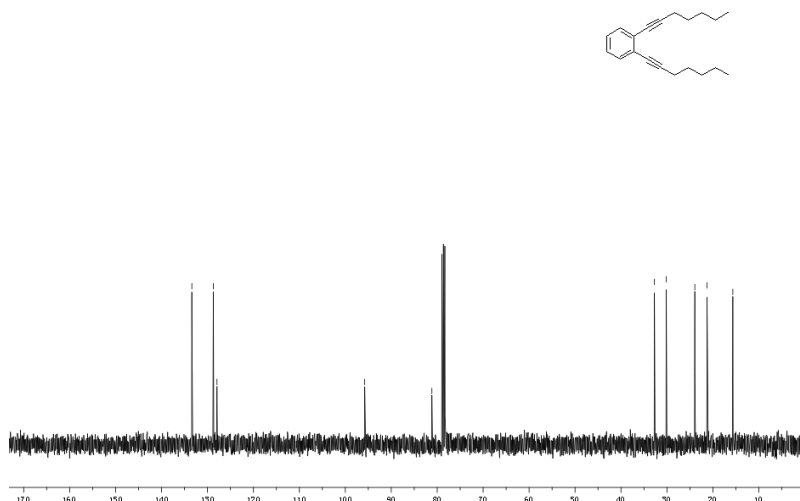

SUDA-TOFMS-EI-101230

QXM-6 660 (11.001) Cm (660.669-(346.374+181.218))

TOF MS EI+  
3.83e3

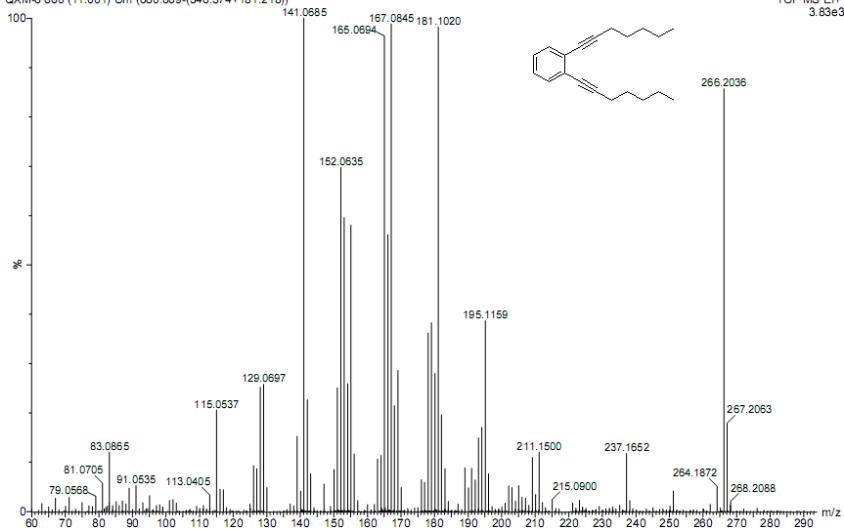

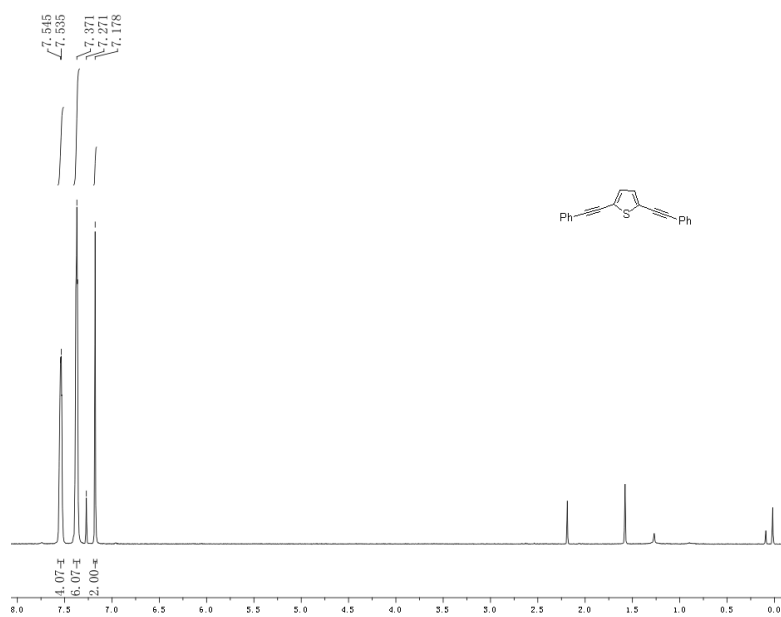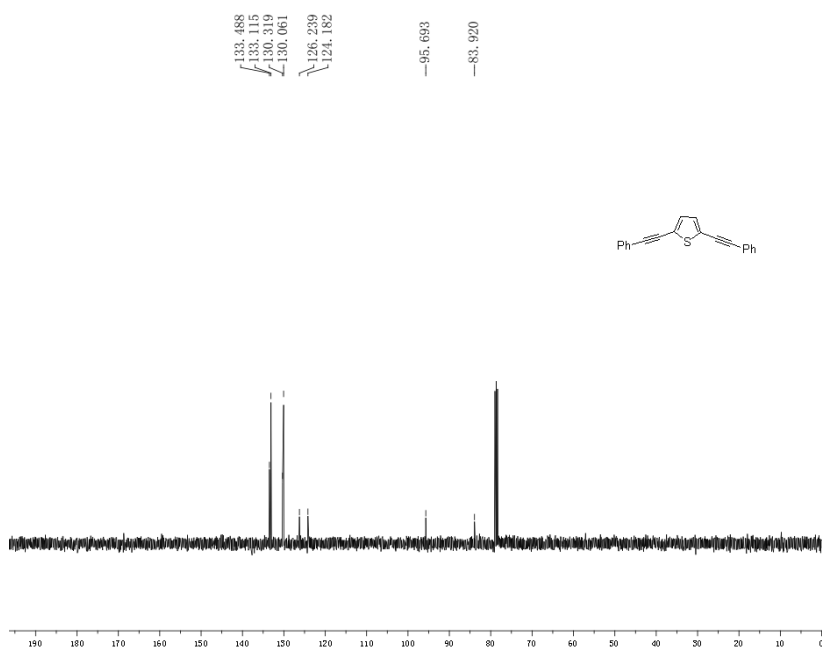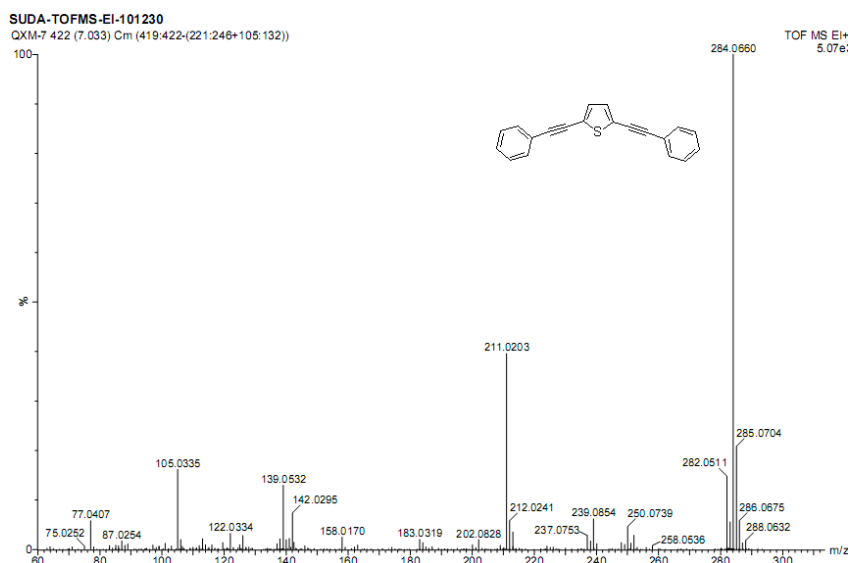

Supplement: c1ob05969f.pdf [file c1ob05969f.pdf]
